# 1 **Spontaneous variability in gamma dynamics** 2 **described by a linear harmonic oscillator driven by** 3 **noise**

4 Georgios Spyropoulos,<sup>1</sup> Jarrod Robert Dowdall,<sup>1,2</sup> Marieke Louise Schölvinck,<sup>1</sup> Conrado  
5 Arturo Bosman,<sup>3,4</sup> Bruss Lima,<sup>5,6</sup> Alina Peter,<sup>1,2</sup> Irene Onorato,<sup>1,2</sup> Johanna Klon-Lipok,<sup>1,5</sup>  
6 Rasmus Roese,<sup>1</sup> Sergio Neuenschwander,<sup>5,7</sup> Wolf Singer,<sup>1,5,8</sup> Martin Vinck,<sup>1,9\*</sup> Pascal  
7 Fries<sup>1,3,9\*</sup>

8 <sup>1</sup>Ernst Strüngmann Institute (ESI) for Neuroscience in Cooperation with Max Planck Society, 60528  
9 Frankfurt, Germany

10 <sup>2</sup>International Max Planck Research School for Neural Circuits

11 <sup>3</sup>Donders Institute for Brain, Cognition and Behaviour, Radboud University, 6525 EN Nijmegen, the  
12 Netherlands

13 <sup>4</sup>Swammerdam Institute for Life Sciences, Center for Neuroscience, Faculty of Science, University of  
14 Amsterdam, 1098 XH Amsterdam, the Netherlands

15 <sup>5</sup>Max Planck Institute for Brain Research, 60438 Frankfurt, Germany

16 <sup>6</sup>Carlos Chagas Filho Institute of Biophysics, Federal University of Rio de Janeiro, 21941-902 Rio de  
17 Janeiro, Brazil

18 <sup>7</sup>Brain Institute, Federal University of Rio Grande do Norte, 59056-450 Natal, Brazil

19 <sup>8</sup>Frankfurt Institute for Advanced Studies, 60438 Frankfurt, Germany

20 <sup>9</sup>These authors contributed equally to this work

21 \*Correspondence: [pascal.fries@esi-frankfurt.de](mailto:pascal.fries@esi-frankfurt.de), [martin.vinck@esi-frankfurt.de](mailto:martin.vinck@esi-frankfurt.de),  
22 [georgios.spyropoulos@esi-frankfurt.de](mailto:georgios.spyropoulos@esi-frankfurt.de)

23

24 **SUMMARY**

25 Circuits of excitatory and inhibitory neurons can generate rhythmic activity in the gamma  
26 frequency-range (30-80Hz). Individual gamma-cycles show spontaneous variability in amplitude  
27 and duration. The mechanisms underlying this variability are not fully understood. We recorded  
28 local-field-potentials (LFPs) and spikes from awake macaque V1, and developed a noise-robust  
29 method to detect gamma-cycle amplitudes and durations. Amplitudes and durations showed a  
30 weak but positive correlation. This correlation, and the joint amplitude-duration distribution, is well  
31 reproduced by a dampened harmonic oscillator driven by stochastic noise. We show that this  
32 model accurately fits LFP power spectra and is equivalent to a linear PING (Pyramidal Interneuron  
33 Network Gamma) circuit. The model recapitulates two additional features of V1 gamma:  
34 (1) Amplitude-duration correlations decrease with oscillation strength; (2) Amplitudes and  
35 durations exhibit strong and weak autocorrelations, respectively, depending on oscillation  
36 strength. Finally, longer gamma-cycles are associated with stronger spike-synchrony, but lower  
37 spike-rates in both (putative) excitatory and inhibitory neurons. In sum, V1 gamma-dynamics are  
38 well described by the simplest possible model of gamma: A linear harmonic oscillator driven by  
39 noise.

40

41 The brain consists of different kinds of cell types which have unique properties, and are commonly  
42 divided into inhibitory (I) and excitatory (E) neurons. Interactions among I and E neurons can  
43 generate collective rhythmic activity in different frequency bands. One of the “faster” rhythms that  
44 neocortical circuits can generate is the gamma rhythm (30-80Hz), whose function has been  
45 heavily debated in the literature <sup>1-20</sup>. This rhythm can be observed at many scales, from the  
46 macro/meso-scale (MEG, EEG, ECoG, LFP), to the microscale (synaptic currents and spiking  
47 activity) <sup>10, 21, 22</sup>. It is however unknown how the properties of collective neuronal gamma  
48 synchronization can arise from the interactions between its microscopic constituents <sup>21, 23</sup>.

49 Observations of macro/meso-scopic gamma dynamics have revealed substantial  
50 variability in the amplitude and frequency of gamma oscillations as a function of time, but also  
51 cortical space <sup>7, 16, 24-29</sup>. In particular, gamma oscillations are not well approximated by sinusoids  
52 <sup>7</sup>, despite the fact that they are often depicted as such. Rather, they show major fluctuations in  
53 their amplitude over time, sometimes described as “bursts”; as well as their frequency, giving rise  
54 to the broad-band spectral nature of gamma. These fluctuations likely reflect the properties of the  
55 underlying E-I circuit and the way it responds to changes in input drive, and they impose  
56 constraints on the possible functional roles of gamma <sup>8, 9, 13, 15, 16, 18, 28, 30</sup>. A previous study in rodent  
57 hippocampus <sup>31</sup> has suggested that cycle-by-cycle fluctuations in amplitude and duration (i.e. the  
58 inverse of frequency) are explained by two components: (1) cycle-by-cycle fluctuations in synaptic  
59 excitation; and (2) balanced, bidirectional interactions between E and I neurons, consistent with  
60 the PING (Pyramidal Interneuronal Network Gamma) model of the gamma rhythm <sup>5, 10, 32-37</sup>. This  
61 model holds that the occurrence of a strong bout of synaptic excitation is balanced by high-  
62 amplitude, long-lasting inhibition. As predicted from this model, this study reported that gamma-  
63 cycle amplitude and duration are strongly correlated ( $r = 0.61$ ) in rodent hippocampus <sup>31</sup>.

64 The starting point of the present study was to see whether this regularity generalizes to  
65 other cortical circuits, in particular to awake primate visual cortex, another system where gamma  
66 oscillations have been extensively studied. It remains unclear how the mechanisms of gamma in  
67 visual cortex compare to hippocampus. It appears that E-I mechanisms of gamma in higher visual  
68 areas (V4) might be comparable to hippocampus <sup>37</sup>, although there is evidence that they are  
69 substantially different in primary visual cortex (V1) <sup>38</sup>. Furthermore, the dependence of V1/V2  
70 gamma on stimulus contrast suggests that increases in synaptic excitation lead to *increases*  
71 rather than *decreases* in the frequency of V1/V2 gamma <sup>25, 39, 40</sup>. It is unknown, however, what the  
72 relationship is between *spontaneous* fluctuations in gamma-cycle amplitude and duration in area  
73 V1.

## 74 RESULTS

75 **Recordings and Task.** We recorded LFPs and spiking activity from the primary visual cortex (V1)  
76 of several awake macaque monkeys (see Methods). Monkeys performed a fixation task, while  
77 drifting gratings or uniform colored surfaces were presented. Fig. 1a shows an example trial of  
78 broad-band LFP recorded during the presentation of a full-screen drifting grating. The trial-  
79 average spectra of absolute power (Fig. 1b) and of the power-change relative to pre-stimulus  
80 baseline (Fig. 1c) reveal strong visually-induced gamma oscillations. The time-frequency analysis

81 (Fig. 1d) shows that this induced gamma rhythm is sustained for the duration of the visual-  
82 stimulation period. Fig. 1f-i shows similar results for visual stimulation with a colored surface<sup>41, 42</sup>.

83

84 **The correlation between gamma cycle amplitude and duration.** A previous study has  
85 examined correlations between the amplitude and duration of individual gamma cycles in the CA3  
86 field of the rat hippocampus<sup>31</sup>. This study found a strongly positive ( $r = 0.61$ ) correlation between  
87 amplitudes and durations, both in vivo and in vitro. We wondered whether a similarly strong  
88 correlation exists in monkey V1. We therefore used the same analysis method as previously used  
89 for the rat hippocampus. This method is based on (1) band-pass filtering LFP signals, (2) detecting  
90 periods of high-amplitude gamma activity, and (3) detecting empirical peaks and troughs in the  
91 filtered signal (Fig. 2a,b; see Methods). Using this method, we found a relatively strong positive  
92 ( $r = 0.361$ ) correlation between the amplitude and duration of individual gamma cycles in the  
93 visual stimulation period (Fig. 2c). By contrast, correlations between the amplitude of a given cycle  
94 and the duration of either the preceding or succeeding cycle were not significant (Fig. 2c).

95 We expected that this result would be specific to the visual stimulation period, in which  
96 gamma oscillations were prominent, but that it would not hold true for the pre-stimulus period, in  
97 which there was no visible gamma peak in the LFP power spectrum (Fig. 1b,g). Nonetheless, for  
98 the pre-stimulus period, the algorithm detailed above detected a substantial amount of gamma  
99 epochs. Surprisingly, we observed even stronger correlations between gamma-cycle amplitudes  
100 and durations for the pre-stimulus ( $r = 0.605$ ) compared to the stimulus period (Fig. 2d).

101 This prompted us to investigate whether the same algorithm would also detect a positive  
102 correlation between gamma-cycle amplitudes and durations for synthetic  $1/f^n$  noise signals (Fig.  
103 2e,f). This was indeed the case (Fig. 2g). Thus, noisy fluctuations in a signal without rhythmic  
104 components can give rise to a strong positive correlation between the amplitudes and durations  
105 of detected “gamma cycles”. The presence of a positive correlation between amplitudes and  
106 durations can be made intuitive by considering a random walk process: In such a process, the  
107 magnitudes of successive steps (i.e. increments or decrements) are independent of each other,  
108 with zero mean. In this case, a successive series of positive increments typically results in a  
109 “cycle” with a high amplitude and a long duration. By contrast, a rapid reversal typically results in  
110 a low-amplitude “cycle” with a short duration. Together, these findings indicate that the positive  
111 correlation between gamma-cycle amplitude and duration in the stimulus period may have been  
112 due to noisy background fluctuations.

113 These results prompted us to develop a method that (1) avoided band-pass filtering in a  
114 narrow frequency-range; and (2) ensured that gamma peaks and troughs were not detected due  
115 to noisy fluctuations, but reflected a rhythmic process (Fig. 3a-d; see Methods). To obtain  
116 estimates of gamma-cycle amplitudes and durations with a high temporal resolution, we  
117 measured them in periods of “half-cycles” (i.e. peak-to-trough or trough-or-peak). (For the rest of  
118 the text, we will be referring to the amplitudes and durations of individual gamma half-cycles as  
119 “gamma-cycle amplitudes” and “gamma-cycle durations”, and will mention explicitly when we  
120 measure them in full rather than half cycles). In contrast to the method used for Fig. 2, we found  
121 that our method detected very few gamma cycles in the pre-stimulus period (Fig. 3a-c). Because  
122 of this, a correlation between gamma-cycle amplitude and duration could not be reliably computed

123 for this period. To further examine the noise-robustness of our method, we simulated an AR(2)  
124 (2<sup>nd</sup> order auto-regressive) process that had a positive correlation between gamma-cycle  
125 amplitudes and durations in the absence of noise. We then added  $1/f^2$  background noise of  
126 different intensities (see Methods). We found that our method did not yield spurious correlations  
127 due to the inclusion of noise; instead it failed to detect any gamma cycles for higher noise-levels  
128 (red line in Fig. 3e). By contrast, the method used for Figure 2 produced higher correlations as  
129 the noise-level increased (Fig. 3e).

130 Using this new method, we then detected gamma-cycle amplitudes and durations for all  
131 trials and available time-points, separately for each recording site and stimulus condition.  
132 Because we were interested in spontaneous variability, we further ensured that correlations  
133 between gamma-cycle amplitudes and durations could not arise due to the time courses of  
134 amplitude and frequency after stimulus onset (Fig. 1e,j). We achieved this by computing  
135 correlations across trials, separately for each available post-stimulus time-point and then  
136 averaging the correlations over time-points (see Methods). With this approach, we found that the  
137 amplitudes and durations of individual gamma half-cycles were positively correlated in all tested  
138 datasets (Fig. 4a). The magnitude of these correlations was, on average, substantially lower ( $\rho$   
139 = 0.199) than the one observed with the previously employed method (compare Figs 2c and 4a).  
140 In addition, we computed the correlation between the amplitude of a given half-cycle and the  
141 duration of the previous or the subsequent half-cycles, and this did not result in a consistent  
142 pattern of correlations across datasets (white bars in Fig. 4a). Similar results were obtained for  
143 full rather than half cycles, with significant correlations only for the same cycle comparison, but  
144 not for the preceding and succeeding cycle (Supplementary Fig. 1a). Thus, amplitude and  
145 duration were weakly but positively correlated across individual cycles of awake monkey V1  
146 gamma.

147  
148 **The influence of slow dynamics and microsaccades.** We wondered whether the observed  
149 correlation between gamma-cycle amplitudes and durations may have resulted from correlated  
150 changes in amplitudes and durations at relatively slow time scales, e.g. due to drifts or slow  
151 oscillations in the monkey's state, or stimulus repetition effects<sup>42-44</sup>. In order to control for the  
152 potential influence of such changes, we computed the correlation between the amplitude of a  
153 given half-cycle and the duration of multiple preceding and succeeding half-cycles (Fig. 4b). Some  
154 datasets showed dynamics on the temporal scale of few half-cycles (Fig. 4b, left), and others on  
155 the scale of multiple half-cycles (Fig. 4b, middle and right). For example, the right panel in Fig. 4b  
156 shows a long-lasting, negative trend punctuated by a small positive value for the instantaneous  
157 correlation. By contrast, the middle panel shows a positive trend peaking at zero lag. These trends  
158 may have contributed to the observed correlation between gamma-cycle amplitude and duration.  
159 We therefore removed the influence of slower dynamics through a linear regression analysis (see  
160 Methods). In this analysis, we first regressed out linear predictions of gamma-cycle amplitude and  
161 of duration from previous and succeeding cycles, and repeated the analysis on the regression  
162 residuals (see Methods). We found that the resulting correlation was comparable to the correlation  
163 between raw amplitude and duration (compare Fig. 4a and 4c). Similar results were obtained for  
164 full cycles (Supplementary Fig. 1b). Together, these findings indicate that the positive correlation

165 between gamma-cycle amplitudes and durations was not due to within- or across-trial trends on  
166 a longer timescale. Further analyses also suggest that the correlation between gamma-cycle  
167 amplitudes and durations was not due to transient changes in amplitudes and durations following  
168 microsaccades (Supplementary Fig. 2; see Methods).

169 To further understand the contribution of non-stationarities to the correlation between  
170 gamma-cycle amplitudes and durations, we fitted an autoregressive (AR) model to the LFP data.  
171 An AR model captures the variance and auto-correlation of the LFP, and can then be used to  
172 generate a stationary surrogate time-series, (by stationary we mean that the underlying statistics  
173 of the signal do not change over time). Supplementary Fig. 3a-d illustrates this for the dataset  
174 used for Fig. 1a-e. We find that the AR model accurately captured the power spectrum  
175 (Supplementary Fig. 3b), but did not replicate slower dynamics in gamma-cycle amplitudes or  
176 durations (Supplementary Fig. 3c,d; compare to Fig. 1d,e). In the surrogate data generated by  
177 the AR model, we then analyzed the correlations between gamma-cycle amplitudes and  
178 durations, and found consistently positive correlations of similar average strength as in the original  
179 data (Supplementary Fig. 3e). Again, similar results were obtained for full rather than half cycles  
180 (Supplementary Fig. 1d). These results further support the notion that the observed correlations  
181 in the LFP data were not due to co-fluctuations or non-stationarities on a slower time scale.

182  
183 **The cycle-based amplitude spectrum and the rate of incidence of cycle-durations.** In the V1  
184 LFP data, we observed a small but positive correlation between gamma-cycle amplitudes and  
185 durations. This correlation, however, does not necessarily imply a monotonic or linear relationship  
186 between gamma-cycle amplitudes and durations, as was reported by Atallah and Scanziani  
187 (2009). We thus examined the joint distribution of gamma-cycle amplitudes and durations in more  
188 detail. To this end, we first computed the average half-cycle amplitude for each possible half-cycle  
189 duration (Fig. 5a, see Methods); we refer to this as the cycle-based amplitude spectrum (CBAS).  
190 To minimize the possible influence of stimulus-locked trends in gamma amplitude and frequency,  
191 we used only the final 250 ms of visual stimulation. To average CBASs across monkeys, we first  
192 converted half-cycle duration values to frequency values (in Hz). We then aligned the CBASs to  
193 the “gamma peak frequency”, that is the frequency at which the Fourier-based power spectrum  
194 (FBPS) reached a maximum. In the CBAS, we found that the relationship between frequency and  
195 amplitude was non-monotonic: The amplitude was greatest at a frequency that was slightly lower  
196 than the peak gamma frequency, and showed a decline towards higher gamma frequencies. In  
197 contrast to the CBAS, we observed that the FBPS was approximately symmetric (Fig. 5a). Thus,  
198 FBPS had a different shape and dependence on frequency than the CBAS. We further wondered  
199 how often different gamma-cycle durations tended to occur. We therefore computed the  
200 cycle- frequency (i.e. inverse of gamma-cycle duration) distribution. We found that the cycle-  
201 frequency distribution was approximately symmetric, and closely matched the FBPS. Specifically,  
202 we found that the most prevalent half-cycle frequency lied within one Hertz of the peak  
203 gamma- frequency derived from the Fourier-based power spectrum (Fig. 5A and Supplementary  
204 Fig. 4a).

205 We wondered whether the observed dependency of gamma-cycle amplitude on cycle-  
206 frequency may have been due to a ceiling effect, because in our analysis we selected those

207 broad-band LFP segments for which gamma rhythms were relatively strong. This selection  
208 circumvented several methodological problems, as discussed above and in the Methods section.  
209 Yet, it may have limited the generalizability of our findings. To address this issue, we re-analyzed  
210 the data after band-pass filtering the LFP in the gamma-frequency range (20-100 Hz). This  
211 modification in our approach substantially increased our sensitivity in detecting gamma episodes.  
212 The distributions of cycle-frequency and amplitude that we obtained after band-pass filtering were,  
213 nevertheless, highly similar to the ones calculated on the broad-band signal (Fig. 5b and  
214 Supplementary Fig. 4b).

215

216 **Relationship of gamma frequency with spiking.** We further wondered how the spontaneous  
217 dynamics of gamma oscillations related to the activation and phase-locking of excitatory and  
218 inhibitory neurons. The more complex PING (Pyramidal Interneuron Network Gamma) model of  
219 Atallah and Scanziani (2009), discussed above, predicts that higher-amplitude gamma cycles are  
220 initiated by a stronger bout of excitatory spiking. These excitatory bouts should then give rise to  
221 longer-lasting inhibition, resulting in longer gamma cycles<sup>31</sup>.

222 In order to assess if this prediction holds true for awake macaque V1, we analyzed multi-  
223 unit (MUA) activity (see Methods). We first computed the normalized spike count (number of  
224 spikes per cycle) (Fig. 6a) as a function of the gamma-cycle frequency (the inverse of gamma-  
225 cycle duration; see Methods). The normalized spike count was negatively correlated with gamma-  
226 cycle frequency (Fig. 6d). This may be a trivial result, because the spike count may simply reflect  
227 the product of firing rate and gamma-cycle duration. To correct for this, we divided the spike count  
228 by the duration, yielding the firing rate (spikes/sec). We observed that firing rates were positively  
229 correlated with gamma-cycle frequency. We wondered if the same result holds true for different  
230 excitatory and inhibitory cell classes. For this reason, we classified single units into three classes  
231 that were previously identified by Onorato et al. (2020) in the same dataset: NW-Burst, NW-  
232 Nonburst (NW: Narrow waveform) and BW (Broad Waveform) units. Previous studies suggest  
233 that NW-Burst and BW units correspond to putative pyramidal cells, whereas NW-Nonburst  
234 neurons correspond to putative fast-spiking interneurons<sup>37, 45, 46</sup>. We found that firing rates were  
235 positively correlated with frequency for all three classes, similar to the MUA (Fig. 6d).

236 We further wondered how spike synchrony was related to gamma-cycle duration. To  
237 investigate this, we (1) computed the duration of each gamma cycle, (2) identified all cycles of a  
238 certain duration, (3) pooled all spikes that were fired in those cycles together, and (4) computed  
239 spike-LFP phase-locking for each pool of spikes. We quantified phase locking with the pairwise  
240 phase consistency (PPC1)<sup>47</sup> metric, which removes potential biases due to spike count or firing  
241 history effects. We found that spike-LFP phase locking was negatively correlated with gamma  
242 frequency (Fig. 6c,d), i.e. positively correlated with gamma-cycle duration. The stronger spike-  
243 LFP phase locking in longer gamma cycles may have been due to a stronger spiking transient (at  
244 the “preferred” gamma phase), despite lower average firing-rates. To examine this, we divided  
245 each gamma cycle into eight non-overlapping phase-bins and computed MUA firing rates for  
246 these different bins. We did this separately for gamma cycles of different durations. As expected,  
247 longer gamma cycles showed a stronger phase modulation of firing rates (Fig. 7a,b). However,

248 we did not observe a stronger spiking transient in longer gamma cycles. Instead, in longer cycles,  
249 there was a stronger suppression of firing at the “non-preferred” gamma phase.

250 Thus, in longer gamma cycles, average firing rates were lower, but synchrony was  
251 enhanced. This was primarily accounted for by a decrease in firing at the non-preferred gamma-  
252 phase, rather than an increase in firing at the preferred gamma-phase. These results differ from  
253 the predictions of the Atallah and Scanziani (2009) model.

254  
255 **Gamma modelled by a harmonic oscillator driven by stochastic noise.** Our results thus far  
256 show that correlations between gamma-cycle amplitudes and durations in awake macaque V1  
257 are much weaker than predicted by the PING model of Atallah and Scanziani (2009).  
258 Furthermore, the relation of instantaneous firing rate with gamma-cycle duration suggests that  
259 different mechanisms are at play in primate V1. We thus wondered if a different model could  
260 explain our observations. As a starting point for developing such a model, we used our  
261 observation (Supplementary Fig. 3) that positive correlations between gamma-cycle amplitudes  
262 and durations were also present for signals generated by the stationary AR model that we fitted  
263 to the LFP data (AR contained 50 to 100 linear terms). This observation was surprising for two  
264 reasons: 1) In an AR model, all variability in amplitude and duration is due to stochastic  
265 fluctuations in the innovation term (white noise); 2) In the AR model, all the interaction terms are  
266 linear (i.e.  $x[t]$  is a linear function of past values of  $x[t]$  plus white noise), whereas previous work  
267 used models including non-linear interaction terms to produce positive amplitude-duration  
268 correlations<sup>31</sup>.

269 To generate oscillatory behavior in an AR model, the minimum number of parameters that  
270 is required is two (AR(2)). The characteristic behavior of an AR(2) can be described by its  
271 eigenvalue. When it has a complex eigenvalue, then the AR(2) model corresponds to a linear,  
272 dampened harmonic oscillator that is stochastically driven (forced) by white noise (Fig. 8a). The  
273 strength of the oscillation can be controlled by changing the magnitude of the eigenvalue (which  
274 needs to lie within the unit circle; we refer to this magnitude simply as the eigenvalue) (Fig. 8b;  
275 see Methods). We investigated whether such a simple AR(2) model produces positive correlations  
276 between gamma-cycle amplitudes and durations. To directly compare AR(2) models to the LFP  
277 gamma oscillations, we fitted AR(2) models to the LFP power spectrum, by minimizing the  
278 squared error in the gamma frequency-range. We found that AR(2) model fits could accurately  
279 reproduce the LFP power spectra in the gamma-frequency range (Fig. 8c). The eigenvalues of  
280 these fits ranged approximately between 0.97 and 0.995 (Fig. 8d); interestingly, this indicates that  
281 gamma oscillations in our V1 data were close to criticality (i.e. network instability). Next, we  
282 generated time series based on the AR(2) model and applied our method to detect gamma half-  
283 cycle amplitudes and durations. In these synthetic AR(2) signals, we observed positive  
284 correlations between amplitudes and durations (Fig. 8e). For the same range of eigenvalues,  
285 these correlations were comparable to the ones found in the V1 LFP data. Hence, positive  
286 correlations between gamma-cycle amplitudes and durations can be reproduced by a linear AR(2)  
287 model.

288 Based on this AR(2) model we made one further prediction, namely that correlations  
289 between gamma-cycle amplitudes and durations should be smaller when gamma oscillations are



290 on average stronger (i.e. have a higher eigenvalue; Fig. 8e). We tested this prediction as follows:  
291 We first fitted an AR(2) model to the LFP spectra separately for each channel and condition, and  
292 determined the eigenvalue of the AR(2) fits (i.e. the oscillation strength) (see Methods). For the  
293 same LFP data, we then computed the amplitude-duration correlations, similar to Fig. 4. We then  
294 regressed the amplitude-duration correlation onto the eigenvalue of the AR(2) fits (Fig. 8f). We  
295 found that, as predicted, amplitude-duration correlations decrease as a function of the eigenvalue.

296 We further wondered if the CBAS of the AR(2) model would be comparable to the one of  
297 the LFP data (Fig. 5). To this end, we generated time series for AR(2) models of different  
298 eigenvalues (Fig. 8g-i). When the AR(2) eigenvalue was comparable to the one found in the LFP  
299 data (Fig. 8h), we observed a non-monotonic relationship between gamma-cycle amplitudes and  
300 gamma-cycle frequency, and a steep decline in gamma-cycle amplitudes towards higher  
301 gamma-cycle frequencies. This matched our findings for the V1 LFP data (shown in Fig. 5).  
302 Furthermore, we found that the cycle-frequency distribution was roughly symmetric around the  
303 peak gamma-frequency in the FBPS (Fig. 8g-i); similar to what we had observed for the V1 LFP  
304 data (Fig. 5). Together, these findings indicate that a simple AR(2) model predicts the observed  
305 amplitude-duration correlation and its negative dependence on average oscillation strength, as  
306 well as the joint amplitude-duration distribution.

307 These findings were surprising to us: We had expected that to reproduce these features  
308 from a model, a large number of parameters and variables containing non-linear interaction terms  
309 would have been required. This becomes less puzzling, however, if one considers that there  
310 exists a basic linear PING model that is mathematically equivalent to the AR(2) model (for proof  
311 see Methods; Fig. 8a). This basic PING model has the following features: It does not contain non-  
312 linear interaction terms; it only assumes stochastic input drive to the excitatory population; and it  
313 does not contain mutual inhibitory connections and mutual excitatory connections. This PING  
314 model also reproduces the characteristic time delay between the excitatory and inhibitory  
315 population as well as E/I balance (Fig. 8a).

316 Based on the AR(2) model, we made two more predictions concerning the variability in  
317 gamma-cycle amplitudes and durations: (1) Amplitudes should be highly correlated across  
318 gamma cycles, i.e. there should be a very high autocorrelation of the gamma-cycle amplitude.  
319 This amplitude autocorrelation should be higher when gamma oscillations are on average  
320 stronger (Fig. 9a). We determined the amplitude autocorrelation by detecting the amplitude of all  
321 detected half-cycles in the LFP data. We then computed the autocorrelation between the  
322 amplitude of a given half-cycle with the amplitude of the previous and succeeding half-cycles. We  
323 found very high autocorrelations in half-cycle amplitude that were comparable to the ones  
324 observed in the AR(2) time series (Fig. 9b,c). Moreover, we found that, as predicted, the amplitude  
325 autocorrelation was an increasing function of the eigenvalue. To rule out that the high amplitude  
326 correlations resulted from using half-cycles, we repeated this analysis on full cycles, and found  
327 essentially the same result (Supplementary Fig. 5).

328 (2) The second prediction was that gamma-cycle durations should be weakly correlated  
329 across gamma cycles, especially when gamma oscillations are on average stronger (Fig. 9d and  
330 Supplementary Fig. 6a). We computed autocorrelations based on the duration of all detected half-  
331 cycles in the LFP data. We found that, as predicted, the autocorrelation of the half-cycle durations

332 was a decreasing function of the eigenvalue (Supplementary Fig. 6c). Yet, we observed that the  
333 autocorrelations of half-cycle durations were consistently negative, different from the  
334 autocorrelations in the AR(2) time series (which were positive or close to zero) (Supplementary  
335 Fig. 6a). This feature was likely due to asymmetric wave shapes of gamma cycles, which may  
336 perhaps reflect a difference in the time constants of the AMPA and GABA currents that generate  
337 the LFP and contribute to different parts of the gamma cycle. To avoid the potential influence of  
338 cycle asymmetry, we therefore repeated our analysis for full-cycle durations. We found that, as  
339 predicted, the autocorrelations of the full-cycle duration were positive but close to zero (bootstrap  
340 mean = 0.041; bootstrap SEM = 0.0038) (Fig. 9d-f) and that the autocorrelations were a  
341 decreasing function of the oscillation strength. In essence, this means that for strong oscillations,  
342 the variability in the duration of the next gamma cycle cannot be accurately predicted from the  
343 variability in the duration of the current gamma cycle.

344

## 345 **DISCUSSION**

346 Circuits of excitatory and inhibitory neurons can generate rhythmic activity in the gamma  
347 frequency-range (30-80Hz). Individual gamma-cycles show ample spontaneous variability in  
348 amplitude and duration. The mechanisms underlying this variability are not fully understood. We  
349 recorded local-field-potentials (LFPs) and spikes from awake macaque V1, and developed a  
350 noise-robust method to detect gamma-cycle amplitude and duration. We show that this method  
351 circumvents several problems that could arise due to band-pass filtering and peak/trough  
352 detection (Figure 2-3). This method allowed us to analyze the precise way in which amplitude and  
353 duration vary between gamma cycles, and how this variation relates to neuronal spiking activity.  
354 These analyses reveal several properties of gamma-oscillatory dynamics in our data:

355 1) The amplitude and duration of individual gamma cycles showed a weak but positive  
356 correlation (Spearman's  $\rho = 0.199$ ).

357 2) Correlations between amplitude and duration decreased when gamma oscillations were  
358 on average stronger.

359 3) Gamma-cycle amplitude was strongly autocorrelated across cycles, especially for  
360 gamma oscillations that were on average stronger. Thus, if a given gamma cycle had a higher  
361 (lower) amplitude, then the next gamma-cycle also tended to have a higher (lower) amplitude.

362 4) Gamma-cycle duration was very weakly autocorrelated across gamma cycles,  
363 especially for gamma oscillations that were on average stronger. This implies that variability in  
364 the duration of the next gamma cycle (which would be around 10ms for a bandwidth of 40-60Hz)  
365 cannot be accurately predicted from the variability in the duration of the current gamma cycle.

366 5) Longer gamma cycles were associated with stronger spike-field phase-locking  
367 (synchrony), but lower firing-rates. Furthermore, longer gamma cycles are not accompanied by  
368 stronger, transient spiking activation.

369 We find that the first four properties can be reproduced by a linear harmonic oscillator  
370 driven by stochastic noise (AR(2) model with complex roots). We show that this model can be  
371 accurately fitted to V1 LFP data and is equivalent to a basic, linear PING (Pyramidal Interneuron  
372 Network Gamma) circuit. This basic PING model does not contain non-linear interaction terms; it

373 only has stochastic input drive to the excitatory population; and lacks recurrent inhibitory  
374 connections as well as recurrent excitatory connections. This PING model also reproduces the  
375 characteristic time delay and balance between the excitatory and inhibitory population. We note  
376 that the idea that oscillations in the brain can be modelled as harmonic oscillators was introduced  
377 many decades ago by <sup>48-50</sup>.

378 Our study was motivated by a previous study of Atallah and Scanziani (2009), who  
379 reported a strong positive correlation ( $r = 0.61$ ) between gamma-cycle amplitude and duration in  
380 rat hippocampus. Here, we show that these positive correlations can arise due to the employed  
381 analysis method, mainly due to the presence of noisy fluctuations in the signal (Fig. 2d,g). To  
382 avoid this problem, we developed an algorithm for the detection of gamma-oscillatory epochs, i.e.  
383 periods in the LFP dominated by gamma oscillations. The correlations computed for these periods  
384 remained positive, but were substantially weaker (Spearman's  $\rho = 0.199$ ; comparable result for  
385 Pearson's  $r$ ) compared to <sup>31</sup>. This highlights that the detection of gamma cycle amplitude and  
386 frequency is difficult, because of the presence of non-stationarities in the analyzed signal, and  
387 filter-generated smearing between adjacent data points in the time domain. This does not mean  
388 that our method detects the "ground-truth" gamma-cycle amplitude or duration: These quantities  
389 do not describe statistical properties of the signal, in contrast to quantities like the power spectral  
390 density. In a linear harmonic oscillator driven by noise, the notion of a "cycle" becomes fuzzy for  
391 low durations and amplitudes: Fluctuations become noise-driven, and the Hilbert-transform can  
392 yield negative frequencies, i.e. phase slips. For this reason, our cycle-detection method explicitly  
393 rejects epochs with phase slips (similar to <sup>51</sup>).

394 As we will discuss now, we reach a different conclusion about the underlying mechanisms  
395 of amplitude-duration correlations than Atallah and Scanziani (2009), although the model that we  
396 propose shares many features with their model. Before doing so, we first briefly mention several  
397 points of debate about the mechanisms of gamma oscillations. First, it is unclear in which circuits,  
398 and under which conditions, gamma oscillations can be generated, and whether they are  
399 generated by an ING (Interneuron Network Gamma) or a PING mechanism <sup>5, 10, 32-37</sup>. Several  
400 studies have observed a delay between the activity of excitatory and inhibitory neurons (or  
401 intracellular E/I currents), consistent with the PING mechanism <sup>37, 52-56</sup>. However, not all studies  
402 find such a phase delay <sup>27, 57, 58</sup>. Moreover, both PING and ING models can produce a wide range  
403 of dynamics depending on the specific parameter settings <sup>36</sup>. A second point of contention is that  
404 the relative contributions of SOM+ and PV+ interneurons remain unclear <sup>10, 59</sup>. And third, in primate  
405 and cat V1, there are specialized excitatory neurons that may play a role in generating high-  
406 amplitude gamma oscillations <sup>38, 45</sup>.

407 Here, we show that many features of gamma-oscillatory dynamics in awake macaque V1  
408 are predicted from a surprisingly simple, stationary model containing only linear dynamics. It is  
409 often assumed that variability in gamma-cycle amplitudes and durations results from non-linear  
410 dynamics or non-stationarities in the underlying signal, e.g. due to eye movements <sup>26, 29</sup> or cross-  
411 frequency coupling <sup>60</sup>. However, we show that spontaneous variability in amplitude and duration  
412 is consistent with an underlying AR(2) model that is stationary. We further show that the AR(2)  
413 model is equivalent to a linear PING model driven by stochastic inputs to the E population. This  
414 model, while sharing several features of the model by Atallah and Scanziani (2009), does not

415 require the presence of a strong, transient bout of excitatory activity to produce long gamma  
416 cycles, as was supposed by the PING model of Atallah and Scanziani (2009). This agrees with  
417 our result that longer V1 gamma cycles are not accompanied by a stronger spiking transient  
418 (Fig. 7).

419 Our model connects two lines of research on gamma dynamics: On the one hand the  
420 PING model, which directly models the interaction between neuronal populations. Our linear PING  
421 model can be considered a reduced case of the linear noise approximation of the Wilson-Cowan  
422 model<sup>61,62</sup>. On the other hand, the model of gamma as filtered white noise<sup>7</sup>, which, like the AR(2)  
423 model, is also a stationary signal model that reproduces the power spectrum of the signal. (Note  
424 that while the AR(2) is a form of filtered white noise, the reverse is not necessarily the case).  
425 Burns et al. showed that the distribution of gamma-burst durations can be reproduced by  
426 generating filtered white-noise, i.e. a mix of sinusoids with random phases and the same  
427 amplitude as the LFP power spectrum (which is different from an AR(p) model)<sup>7</sup>. Further, by  
428 computing auto-coherence over the wavelet transform of the LFP signal, Burns et al., found  
429 relatively weak auto-coherence of gamma over time (around 0.3-0.4 resultant length)<sup>63</sup>. Here we  
430 performed a similar analysis with a cycle-by-cycle detection method that avoids spurious  
431 correlations due to windowing or band-pass filtering. In our data, we find that the correlation  
432 between the full-cycle-duration of the current and the next cycle is close to zero  
433 (bootstrap mean = 0.0406), and approaches zero for strong oscillations. It remains unclear  
434 whether our very simple model reproduces all features of gamma-oscillatory dynamics; it is  
435 possible that more complex models are needed in order to do so, and our model primarily models  
436 spontaneous gamma dynamics. However, it is quite surprising that the gamma oscillations in the  
437 collective, high-dimensional dynamics of millions of V1 neurons, measured at the macro/meso-  
438 scale, are well predicted from a model that is linear and contains only two parameters.

## 439 **ACKNOWLEDGEMENTS**

440 We thank Michael Schmid and Richard Saunders for planning and performing surgical  
441 implants, and Thomas Stieglitz and Eva-Maria Fiedler for producing the polyimide-based ECoG  
442 arrays. We thank Boris Gutkin and Gregory Dumont for helpful comments. GS was supported by  
443 ERC Starting Grant (SPATEMP to MV). MV acknowledges grant support from BMF  
444 (Computational Life Sciences) and ERC Starting Grant (SPATEMP). PF acknowledges grant  
445 support by DFG (SPP 1665 FR2557/1-1, FOR 1847 FR2557/2-1, FR2557/5-1-CORNET,  
446 FR2557/6-1-NeuroTMR), EU (HEALTH-F2-2008-200728-BrainSynch, FP7-604102-HBP, FP7-  
447 600730-Magnetorodes), a European Young Investigator Award, NIH (1U54MH091657-WU-Minn-  
448 Consortium-HCP), and LOEWE (NeFF). MLS acknowledges grant support by HFSP (HFSP  
449 fellowship LT000904/2011-L).

## 450 **AUTHOR CONTRIBUTIONS**

451 Conceptualization, G.S., M.V., and P.F.; Methodology, G.S., M.V., and P.F.; Software,  
452 G.S., J.R.D., and M.V.; Analysis of LFP data, G.S. and M.V.; Analysis of spiking data, M.V. and  
453 I.O.; Simulations and mathematical analysis of AR(2) model, GS and M.V.; Experiments G.S.,

454 J.R.D., M.L.S., C.A.B., B.L., A.P., J.K.-L., R.R., S.N., W.S., and P.F.; Writing, G.S., M.V., and  
455 P.F.; Supervision, M.V. and P.F.; Funding Acquisition, W.S., M.V., and P.F..

456 **COMPETING FINANCIAL INTERESTS**

457 P.F. has a license contract with Blackrock Microsystems LLC (Salt Lake City, U.S.A.) for  
458 technology not used in this study.

## 459 METHODS

460

461 **Subjects.** We analyzed data from a total of 6 adult macaque monkeys (*macaca mulatta*),  
462 referred to as monkey H, I, J, L, P and T. Monkeys I and L are/were female, the others male. The  
463 experiments were approved by the responsible regional or local authority, which was the  
464 Regierungspräsidium Darmstadt, Germany, for monkeys H, I, J, L and T, and the ethics  
465 committee of the Radboud University, Nijmegen, Netherlands, for monkey P.

466

467 **Recordings.** We used different recording procedures and stimulus paradigms for the different  
468 monkeys, and will describe these separately for the different monkeys.

469 **Task.** All monkeys performed a passive fixation task. The specific details of the task performed  
470 by monkeys I and P were as follows: Monkeys initiated a trial by depressing a lever (monkey I) or  
471 touching a bar (monkey P), which triggered the appearance of a fixation point, and then brought  
472 their gaze into a fixation window around the fixation point. Monkeys were required to fixate on the  
473 fixation point, which was centered on a gray background, after which a stimulus was presented.  
474 If they kept their gaze within the fixation window as long as the stimulus was presented, they were  
475 given a juice reward after the release of the lever/bar following stimulus offset. Monkeys H, J, L  
476 and T performed a similar task, with the initiation/termination of the trial being solely dependent  
477 on the acquisition/release of fixation (i.e. not dependent on pressing a lever or touching a bar).  
478 Further details of this version of the task are described in <sup>42</sup> for monkey H, and in <sup>24</sup> for monkeys  
479 J and L. For all monkeys, fixation windows ranged between 0.5 and 1.2 degrees radius.

480

481 **Recordings (electrodes, reference).** For monkey H, recordings were done with CerePort  
482 ("Utah") arrays (64 micro-electrodes; inter-electrode distance 400  $\mu\text{m}$ , tip radius 3-5  $\mu\text{m}$ ,  
483 impedances 70-800 k $\Omega$ , half of them with a length of 1 mm and half with a length of 0.6 mm,  
484 Blackrock Microsystems). A reference wire was inserted under the dura toward parietal cortex.  
485 Further details are reported in <sup>42</sup>. For monkey I, a semi-chronic microelectrode array micro-drive  
486 was implanted over area V1 of the left hemisphere (SC32-1 drive from Gray Matter Research; 32  
487 independently movable glass insulated tungsten electrodes with an impedance range of 0.5-2 M $\Omega$   
488 and an inter-electrode distance of 1.5 mm, electrodes from Alpha Omega). We used the micro-  
489 drive chamber as the recording reference. For monkeys J and L, recordings were performed with  
490 2 to 10 microelectrodes, made of quartz-insulated, tungsten-platinum material (diameter: 80  $\mu\text{m}$ ;  
491 impedances between 0.3 and 1M $\Omega$ ; wire from Thomas Recording). These were inserted  
492 independently into the cortex via transdural guide tubes (diameter: 300 $\mu\text{m}$ ; Ehrhardt Söhne),  
493 which were assembled in a customized recording device (designed by S.N.). This device  
494 consisted of 5 precision hydraulic micro-drives mounted on an X-Y stage (MO-95, Narishige  
495 Scientific Instrument Laboratory, Japan), which was secured on the recording chamber by means  
496 of a screw mount adapter. Inter-electrode distance ranged between 1 and 3 mm. We used the  
497 micro-drive chamber as the recording reference. Further details are reported in <sup>24</sup>. For monkey P,  
498 we recorded neuronal activity with a micro-machined 252-channel electrocorticogram (ECoG)  
499 electrode array implanted subdurally on the left hemisphere <sup>64-66</sup>. We used a silver ball implanted  
500 over occipital cortex of the right hemisphere as the recording reference. For monkey T, we

501 recorded neuronal activity with a micro-machined 252-channel ECoG electrode array implanted  
502 subdurally over areas V1 and V4 of the left hemisphere (252 electrodes; inter-electrode distance  
503 1400  $\mu\text{m}$ ; electrode diameter 400  $\mu\text{m}$ , IMTEK & BCF, University of Freiburg)<sup>64</sup>. We used an  
504 electrode adjacent to the lunate sulcus as a recording reference for the section of the array  
505 covering area V1.

506

507 **Recordings (acquisition,filtering).** For monkeys H, I and T, we acquired data with Tucker  
508 Davis Technologies (TDT) systems. Data were filtered between 0.35 and 7500 Hz (3 dB filter  
509 cutoffs) and digitized at 24,414.0625 Hz (TDT PZ2 preamplifier). For monkeys J and L, we  
510 obtained spiking activity and the LFP by amplifying 1000 times and band-pass filtering (0.7-6.0  
511 kHz for MUA; 0.7-170 Hz for LFP) with a customized 32-channel Plexon pre-amplifier connected  
512 to an HST16o25 headstage (Plexon Inc., USA). Additional 103-fold signal amplification was  
513 performed by onboard amplifiers (E-series acquisition boards, National Instruments, USA). For  
514 monkey P, we acquired data with a Neuralynx system. Data were amplified 20 times, high-pass  
515 filtered at 0.159 Hz, low-pass filtered at 8 kHz, and digitized at 32 kHz by a Neuralynx Digital Lynx  
516 system.

517

518 **Receptive field mapping/Eccentricities.** Receptive fields (RFs) were mapped with either  
519 bar stimuli<sup>(24, 42)</sup>; monkeys H, I, J, L), patches of moving gratings<sup>(65)</sup>; monkey P) or red dots  
520 (monkey T). The signal used for RF mapping was multi-unit activity (MUA) for monkeys H, I, J, L,  
521 and the LFP gamma power for monkeys P and T. For monkeys J and L, we recorded neuronal  
522 activity from the opercular region of area V1, leading to RF-center eccentricities of 2-3 deg, and  
523 occasionally from the superior bank of the calcarine sulcus, leading to RF-center eccentricities of  
524 10-13 deg. For monkey H, RF-center eccentricities ranged between 5.2 and 7.1 deg (median RF-  
525 center eccentricity 6.2 deg). For monkey I, RF-center eccentricities ranged between 2.6 and  
526 6.7 deg (median RF-center eccentricity 4.5 deg). For monkey P, RF-center eccentricities ranged  
527 between 3 and 5.7 deg (median RF-center eccentricity 4.6 deg). For monkey T, RF-center  
528 eccentricities ranged between 3.1 and 7.1 deg (median RF-center eccentricity 3.8 deg).

529

530 **Eye position monitoring.** For monkeys H, I and T, eye movements and pupil size were  
531 recorded at 1000 Hz using an Eyelink 1000 system (SR Research Ltd.) with infrared illumination.  
532 For monkeys J and L, we monitored the eye position with a scleral search coil system (DNI, Crist  
533 Instruments, USA; sampling rate of 500 Hz). For monkey P we monitored eye position with an  
534 infrared camera system (Thomas Recording ET-49B system) at a sampling rate of 230 Hz. We  
535 used a standardized fixation task in order to calibrate eye signals before each recording session.

536

537 **Behavioral control and stimulus presentation.** Stimulus presentation and behavioral  
538 control was implemented as follows: The software toolbox ARCADE ((Dowdall et al., 2018)  
539 <https://gitlab.com/esi-neuroscience/arcade>) was used for monkeys H, I and T; Custom LabVIEW  
540 code (Lab-VIEW, National Instruments, USA) was used for monkeys J and L; The software  
541 toolbox CORTEX ([dally.nimh.nih.gov/index.html](http://dally.nimh.nih.gov/index.html)) was used for monkey P.

542 Monkeys H and I were presented with full-screen uniform color surfaces. Surface color  
543 varied across trials according to a pseudo-random sequence. For our analyses, we used the hue  
544 that elicited the strongest gamma oscillations (monkey H RGB: 149 99 0; monkey I RGB: 255 0  
545 0). In a separate session, monkey I was also repeatedly presented with a full-screen drifting  
546 square-wave red-and-green grating of a fixed initial phase and drift-direction (RGB for red 255 0  
547 0 and green 0 255 0; spatial frequency: 1.5 cycles/degree; temporal frequency 2 Hz). Monkeys J  
548 and L were presented with large drifting square-wave black-and-white gratings (spatial  
549 frequencies: 1.25-2 cycles/degree; temporal frequencies: 1.4-2Hz) and plaid stimuli. Only the  
550 gratings were used for our analyses. The gratings had a diameter of 8 degrees of visual angle  
551 and were positioned at the average of the RF centers of the recorded MUA. In each trial, the  
552 direction of the grating drift was randomly chosen from 16 directions (in steps of 22.5 degrees).  
553 Monkey P was repeatedly presented with a full-screen drifting square-wave black-and-white  
554 grating of a fixed initial phase and drift-direction (spatial frequency: ~1 cycle/degree; temporal  
555 frequency ~1Hz). Monkey T was presented with full-screen uniform color surfaces, with the color  
556 changing across trials according to a pseudo-random sequence. For our analyses, we used two  
557 hues that elicited the strongest gamma oscillations (RGB: 255 0 0 and 0 0 255). In separate  
558 sessions, monkey T was also presented with full-screen drifting square-wave colored gratings of  
559 pseudo-random initial phases and drift-directions. For our analyses, we used the gratings that  
560 elicited the strongest gamma oscillations (red-green RGB: 255 0 0 and 0 255 0 and blue-yellow  
561 RGB: 0 0 255 and 255 255 0; spatial frequency: 1.5 cycles/degree; temporal frequency 2 Hz). For  
562 monkeys H, I and T, stimuli were presented on 120 Hz LCD monitors<sup>67</sup>, without gamma  
563 correction. For monkeys J, L and P, stimuli were presented on CRT monitors (100-120 Hz), after  
564 gamma correction.

565  
566 **Data analysis.** All analyses were done in MATLAB (The MathWorks) using custom scripts and  
567 the FieldTrip toolbox ([www.fieldtriptoolbox.org](http://www.fieldtriptoolbox.org)<sup>68</sup>). The analyses were done only on correct trials.  
568 In monkeys P and T, we selected the 25% electrodes/sites over area V1 with the strongest visually  
569 induced gamma band activity, because the grids covered a relatively large region of retinotopic  
570 space and contained electrodes that were poorly driven by the visual stimulus. In monkeys H, I,  
571 J and L, we analyzed all visually driven electrodes. In all monkeys except for monkey T, we  
572 analyzed LFP signals that were recorded relative to the common reference signal (described  
573 above). For monkey T, we calculated local bipolar derivatives between LFPs from immediately  
574 neighboring electrodes. i.e., differences (sample-by-sample in the time domain), similar to  
575 previous studies<sup>65</sup>. This was done because the global references in monkey T were positioned  
576 over V1 and V4 in the same hemisphere.

577  
578 **Preprocessing.** For monkeys H, I and T, LFPs were obtained from the broadband signal after  
579 low-pass filtering (sixth order Butterworth filter with a corner frequency of 500 Hz), high-pass  
580 filtering (third order Butterworth filter with a corner frequency of 2 Hz for monkey T and 4 Hz for  
581 monkeys H and I) and down-sampling to 2034.51 Hz. For monkeys J and L, LFPs were filtered  
582 between 0.7-170Hz (hardware-filter, described above) and down-sampled to 1 kHz. For monkey  
583 P, we obtained LFP signals by low-pass filtering at 200 Hz and down-sampling to 1 kHz. In



584 addition, for monkey P, we removed powerline artifacts at 50 Hz and its harmonics with a digital  
585 notch filter.

586

587 **Segmenting Data into Epochs, and Calculation of Power and TFR.** To estimate the  
588 LFP power spectra in the stimulus and baseline periods (Figs 1b,c,g,h, 5, 6a-c, and  
589 Supplementary Figs 3b, 4), we used the following procedure: Power spectra were estimated  
590 separately for the pre-stimulus period and the stimulation period. The pre-stimulus period was the  
591 time between fixation onset and stimulus onset. During the pre-stimulus period, monkeys fixated  
592 on a central dot on a gray screen, and there was no other stimulus presented. For monkeys H, I,  
593 P and T, the pre-stimulus and stimulation periods were of variable length across trials. We kept  
594 data corresponding to the pre-stimulus and stimulation period with the minimum length (monkey  
595 H: baseline 0.3s / stimulation 1.5s; monkey I: baseline 0.5s / stimulation 2s; monkey P: baseline  
596 0.3s / stimulation 2.3s; monkey T: baseline 1.1s / stimulation with full-screen gratings 2.8s /  
597 stimulation with full-screen uniform color surfaces 3.2s). For monkeys J and L, the pre-stimulus  
598 and grating-stimulation periods had a stable duration across trials within a session but their  
599 duration varied between sessions. All of the available pre-stimulus and grating data were  
600 analyzed for those monkeys (baseline 0.8-1s / stimulation 2-2.4s). The power spectral analysis  
601 was based on epochs of fixed lengths. Therefore, the described task periods were cut into non-  
602 overlapping epochs. We aimed at excluding data soon after stimulus onset (“event”) to minimize  
603 the influence of the stimulus-onset related event-related potential on our analyses. Therefore,  
604 periods were cut into non-overlapping epochs, starting from the end of the period and stopping  
605 before an epoch would have included data approximately 0.5 s after those events. For  
606 Fig. 1b,c,g,h, the estimation of power spectra was based on epochs of 0.5 s length; for Figs 5,  
607 6a-c and Supplementary Figs 3b and 5, power spectra were based on epochs of 0.25 s. Data  
608 epochs were Hann tapered, to achieve a fundamental spectral resolution (Rayleigh frequency) of  
609 2 Hz (4 Hz for Figs 5, 6a-c and Supplementary Figs 3b and 5), and then Fourier transformed. The  
610 gamma-band power spectra used for the AR(2) fits (Figs 8c,d,f, 9c,f, and Supplementary Figs 5b,  
611 6c), the power spectra of synthetic AR(2) signals (Fig. 8b), and the joint distribution of gamma-  
612 cycle amplitude and duration (Fig. 8g-i) were based on rectangular windows of 1s, in order to  
613 ensure minimal spectral smearing, and thus a more accurate fit. For the time-frequency analysis  
614 of power, we used window lengths of  $\pm 2.5$  cycles per frequency which were slid over the available  
615 data in steps of 1 ms. Power during the stimulation period was normalized to the pre-stimulus  
616 baseline period, separately for each channel, in the following manner: Power per frequency and  
617 per trial was calculated as described above. Power calculated for the pre-stimulus baseline period  
618 was then averaged across trials. Finally, trial-wise normalized power was calculated for the  
619 stimulation period by subtracting the average pre-stimulus spectrum and then dividing by it.

620

621 **Spike sorting.** Single units were isolated through semi-automated spike sorting<sup>38</sup>. First, we  
622 performed semi-automatic clustering with the KlustaKwik 3.0 software. The energy of the spike  
623 waveform and the energy of its first derivative were used as features in this procedure. A  
624 candidate single unit was accepted if the corresponding cluster was clearly separable from the  
625 noise clusters, and if the inter-spike-interval distribution had a clear refractory-period. This was

626 done manually with the M-Clust software. In addition, we used the isolation distance (ID; <sup>69</sup>) as a  
627 measure of cluster separation. The ID of a candidate single unit had to exceed 20 in order for it  
628 to be included in our analyses. The median ID was 25.05. This procedure led to the isolation of  
629 100 single units. For each isolated single unit, we computed the peak-to-trough duration of the  
630 average AP waveform. Single units with long (>0.235ms) and short (<0.235ms) peak-to-trough  
631 durations were named “broad-waveform” (BW) and “narrow-waveform” (NW) neurons,  
632 respectively. Broad-waveform neurons corresponded to 29% of the single unit population.

633

634 **Initial estimation of gamma-cycle amplitude and duration (cf. Atallah & Scanziani,**  
635 **2009).** For our initial analyses of individual gamma cycles, we implemented the algorithm as  
636 described by Atallah and Scanziani (2009) for data from awake freely-moving rats. In short, we  
637 first low-pass filtered the LFP by using a 40 ms moving average filter and then subtracted this  
638 filtered signal from the original time series (Experimental Procedures and Supplemental  
639 Experimental Procedures of Atallah and Scanziani, and their personal communication with us),  
640 which effectively corresponds to a high-pass filter with a corner frequency at approximately 20 Hz.  
641 The resulting signal was further band-pass filtered in the range of 5-100 Hz with a 3<sup>rd</sup> order,  
642 two-way Butterworth filter. Gamma-cycle peaks and troughs were then defined as local maxima  
643 and minima, respectively. Furthermore, gamma-cycle amplitudes were defined as the difference  
644 between the voltage of a given peak and its subsequent trough. Similarly, gamma-cycle durations  
645 were defined as the interval between a given peak and its subsequent peak. This analysis was  
646 done in segments of the filtered signal which displayed high power in the individual gamma  
647 frequency range of each dataset (peak gamma frequency $\pm$ 20 Hz). These segments were  
648 extracted in the following way: A time-power representation of each trial was calculated with 5  
649 discrete prolate spheroidal sequences and windows of 100 ms which were slid over the available  
650 data in steps of 25 ms. Gamma episodes were defined as segments of the resulting time-series  
651 which lasted for more than 100 ms and had power that exceeded a threshold. This threshold was  
652 calculated separately for each trial as the difference between the mean of the time-power  
653 representation and its standard deviation.

654

655 **Generation of colored noise.** In Figure 2G, we analyzed the correlations obtained with the  
656 Atallah-Scanziani method for colored noise. We generated noise with power spectra following a  
657  $1/f^n$  function, where  $f$  denotes frequency and  $n$  assumes 11 equally spaced values between, and  
658 including, 0 (corresponding to white noise) and 2 (corresponding to Brownian noise). This was  
659 done in the following manner: (i) 1000 white noise traces containing  $10^6$  samples were generated  
660 for each  $n$ . (ii) Each trace was Fourier transformed. (iii) The complex coefficients of the positive  
661 frequencies in the resulting spectra were multiplied by the  $1/f^n$  function. (iv) A synthetic spectrum  
662 was constructed by concatenating the above complex coefficients with the conjugate of their  
663 flipped version. (v) The resulting spectrum was inverse Fourier transformed to obtain time series.

664

665 **Improved estimation of gamma-cycle amplitude and duration.** We developed an  
666 improved method to extract gamma-cycle amplitude and frequency from the LFP signals as  
667 follows:

668 1. We computed the Hilbert-transform of the broadband LFP signal to obtain the analytic  
669 signal and derive the time-resolved phase from it. We used the broadband signal, because band-  
670 pass filtering creates dependencies between voltage values across time points, and can transform  
671 transient, non-oscillatory deflections into rhythmic events.

672 2. We detected gamma cycles as follows: First, we detected all the zero-crossings of the  
673 phase. Such phase zero crossings occur in the neighborhood of peaks and troughs in the original  
674 LFP signal. For each k-th zero-crossing, we examined whether the angular velocity of the phase  
675 was positive for all time points between the k - 1-th to the k + 1-th zero-crossing (similar to <sup>70</sup>). If  
676 this was not the case, then there was a negative “phase-slip” in which the instantaneous frequency  
677 became negative, and the respective zero crossing plus/minus two neighboring zero crossings  
678 were discarded. Negative instantaneous frequencies make the interpretation of the instantaneous  
679 frequency and amplitude ambiguous, and are typically accompanied by small peaks/troughs in  
680 the LFP signal. This violates our model of the gamma oscillation as a signal with a positive  
681 frequency which fluctuates over time,  $y(t) = A(t) * \cos(\omega(t)*t + \phi)$ , where  $A(t)$  and  $\omega(t)$  are the  
682 instantaneous amplitude and frequency fluctuating over time.

683 If there was no negative phase-slip, then we identified gamma peaks by first detecting  
684 negative-to-positive zero crossings in the phase of the analytic signal. For each of these  
685 crossings, we then identified the nearest local maximum in the LFP signal (Fig. 3d). Likewise,  
686 gamma troughs were identified by detecting positive-to-negative zero crossings and identifying  
687 nearby local minima. Using the detected gamma peaks and troughs, we then determined the  
688 gamma-cycle amplitude and duration. To obtain estimates of gamma-cycle amplitude and  
689 duration with the maximum attainable temporal resolution, we divided each gamma cycle into  
690 “half-cycles”: The first half-cycle comprised the data segment from the trough to the peak, and  
691 the second half-cycle from the peak to the trough. For each half-cycle, amplitude was defined as  
692 the difference between the respective peak and trough, and duration was defined as the  
693 corresponding time interval. For each detected half-cycle, we thus obtained an amplitude and  
694 duration value. For comparison, we also determined amplitude and duration for full gamma cycles.  
695 A gamma cycle comprised the data from one peak to the next peak. Amplitude was defined as  
696 the voltage difference between the first peak and the trough. Duration was defined at the time  
697 between the two peaks.

698 Note that for the analysis of the relationship between individual gamma cycles and spiking  
699 activity, we used a band-pass filter (3<sup>rd</sup> order, two-pass Butterworth, with a pass-band of 40-90  
700 Hz for monkey J and 25-55 Hz for monkey L). In this case, we used an additional criterion to reject  
701 epochs of spurious oscillatory activity <sup>38</sup>: We ran the same cycle-selection procedure on the pre-  
702 stimulus period, in which narrow-band gamma-band oscillations are virtually absent. For the pre-  
703 stimulus period, we obtained the mean  $\mu_{pre}$  and standard deviation  $\sigma_{pre}$  of the distribution of  
704 amplitudes. These amplitudes were measured as the peak-to-trough distance of the gamma  
705 cycle. A cycle in the stimulus period with amplitude  $A$  was only selected if  $(A - \mu_{pre})/\sigma_{pre} > 1:63$   
706 (which is equivalent to a one-sided T-test at  $P < 0.05$ ). We filtered the LFP with the purpose of  
707 increasing the number of selected gamma epochs, considering that the analysis of unit firing rates  
708 and spike-field phase-locking demands a relatively large amount of data. Note that we have  
709 shown in Fig. 5 that the distributions of amplitude and frequency after band-pass filtering are

710 comparable to the distributions obtained without band-pass filtering. In addition, the potential  
711 issues related to filtering only apply to the calculation of correlations of amplitude and duration  
712 and not to the calculation of the correlation of spiking strength and gamma frequency. This is due  
713 to the fact that filtering may generate artificial correlations between the amplitudes and durations  
714 of deflections of the same time series (explained further in the results section). The filter used on  
715 the LFP is not used on the spiking activity. Thus, artificial correlations between spiking and cycle-  
716 by-cycle frequency are not likely.

717 Amplitude and frequency values were extracted from selected gamma epochs of a  
718 duration of at least 2 full cycles.

719

720 **Computation of time-resolved correlations between amplitude and frequency.** In the  
721 case of our V1 recordings, we observed that gamma amplitude and cycle duration progressively  
722 increased over time after the onset of a drifting grating stimulus. (Fig. 1c,d). By contrast, after the  
723 onset of a uniform color surface, gamma amplitude and duration progressively decreased and  
724 increased over time, respectively (Fig. 1g,h). These changes with time after stimulus onset could  
725 contribute to the correlation values between gamma-cycle amplitude and duration, if gamma  
726 amplitude and duration values are concatenated across all trials and time points. This would  
727 conceal the relationship between gamma-cycle amplitude and duration due to intrinsic variability,  
728 by introducing a positive or negative correlation bias for drifting gratings and uniform color  
729 surfaces, respectively.

730 We avoided these effects by using the following method: We calculated correlations  
731 between gamma-cycle amplitudes and durations across all trials, separately for each time point  
732 (at the respective sampling rate) after stimulus onset, and subsequently averaged those  
733 correlation values over time points and subsequently over recording sites. To enable this, we  
734 needed to define gamma-cycle amplitudes and durations for each time point. Therefore, each  
735 time point (relative to stimulus onset) was localized to the gamma half cycle (or full cycle), into  
736 which it fell, and it was assigned the respective amplitude and duration of that half cycle (or full  
737 cycle). For the calculation of correlations with one or multiple half-cycle (or full-cycle) lags,  
738 correlations were calculated between amplitudes and durations shifted relative to each other by  
739 the corresponding number of half-cycles (or full cycles).

740 In datasets containing more than one stimulus condition, correlation coefficients were  
741 calculated separately for each condition and then averaged across conditions.

742 As mentioned in the results section, the correlation analysis used the Spearman  
743 correlation coefficient. Like in <sup>31</sup>, we found results to be essentially identical for Spearman and  
744 Pearson correlation, when using their method of determining gamma-cycle amplitude and  
745 duration. For the rest of our analyses, we used exclusively the Spearman correlation coefficient.

746

747 **Statistical significance of correlations.** The statistical significance of auto- and  
748 cross- correlations of gamma-cycle amplitudes and durations, and correlations between AR(2)-fit  
749 eigenvalues and auto- or cross correlations of gamma-cycle amplitudes and durations was  
750 assessed by means of a non-parametric randomization approach. In this paragraph, we will  
751 describe this approach for the cross-correlation of amplitudes and durations: The order of valid

752 duration values was randomly shuffled across trials, separately for each time-point. We then  
753 calculated surrogate Spearman's correlation coefficients 1000 times as described above for each  
754 dataset. Next, we performed a fit of a Gaussian distribution on the 1000 surrogate correlation  
755 coefficients. Empirical correlations were deemed significant if they were 3 standard deviations  
756 larger or smaller than the mean of the surrogate distribution. This procedure implements a non-  
757 parametric version of a two-sided test with a p-value of  $\approx 0.001$ .

758 To test if the mean correlation of gamma-cycle amplitudes and durations is significantly  
759 different from zero across datasets, we applied a Student's t-test. In general, we prefer non-  
760 parametric randomization tests over parametric tests (like the t-test). However, some analyses  
761 contained only four or five datasets, which effectively precludes the application of non-parametric  
762 tests. Where possible, we supplemented the t-test with a non-parametric statistical test (Figs 2c,  
763 4a,c, and Supplementary Fig. 1a). Specifically, we calculated the mean correlation across  
764 datasets for each possible combination of values that results after independently inverting or  
765 maintaining the sign of each correlation value (i.e. a full permutation). This led to a surrogate  
766 distribution of mean values to which the empirical mean was compared for statistical significance.  
767 Mean correlations were deemed significant if they were larger (smaller) than the top (bottom) 2.5  
768 percentile of this surrogate distribution.

769  
770 **Regression analysis.** We performed regression analyses separately for gamma-cycle  
771 amplitudes and durations with the Matlab function *regress*. As explained in the results section, for  
772 each half-cycle, we regressed the amplitude value of the ongoing half-cycle against the amplitude  
773 values of the previous and next half-cycle, by using a least squares approach. We used the same  
774 procedure for half-cycle duration values. This was done for each point after stimulus onset  
775 separately, and by using all the amplitude and duration values across trials (for that time point).  
776 We then calculated the regression residuals by subtracting each amplitude and duration  
777 regression vector from the corresponding amplitude and duration values, separately for each  
778 timepoint. These residual values measured the extent to which the amplitude or duration in the  
779 ongoing half-cycle was greater or smaller than in the surrounding half-cycles, and thereby  
780 departed from slower trends. We then computed the correlation between the regression residuals  
781 for amplitude and duration, in the same way as described above.

782  
783 **Micro-saccade detection.** We low-pass filtered vertical and horizontal eye position signals by  
784 replacing each value with the average over itself  $\pm 15$  ms. We then computed the first temporal  
785 derivative of the signals to obtain the vertical and horizontal velocities. We combined those values  
786 to obtain the eye speed irrespective of the direction of eye movement. Per trial, we determined  
787 the SD of eye speed, and any deviation  $> 4$  SDs and lasting for at least 30 ms was deemed a  
788 saccadic eye movement. Saccadic eye movements that remained within the fixation window were  
789 considered to be MSs.

790  
791 **AR.** In Supplementary Fig. 3, we computed our correlations for data generated through auto-  
792 regressive models with a power spectrum similar to the recorded LFP data. An autoregressive  
793 (AR) model of order  $n$  represents each value in a time-varying process as the linear sum of its  $n$

794 preceding values (each weighted by a separate coefficient) and a stochastic term. This model can  
795 then be used to generate a synthetic time series that has the same power spectrum as the original  
796 process, but that is devoid of higher-order statistical properties such as slow temporal trends or  
797 spectral cross-frequency dependencies. We modelled the LFP as an AR process of a relatively  
798 high order (50 for monkeys J and P, whose analysis was based on a sampling rate of 1000 Hz,  
799 and 100 for monkeys H, I, T, whose analysis was based on a sampling rate of 2034.51 Hz). We  
800 did this by fitting a vector of AR coefficients and a noise variance term with the Matlab function  
801 *arfit*, simultaneously to all the trials of a given stimulus condition and independently for each  
802 recording site. For our analyses, we only used the period of the trial starting at 250 ms after  
803 stimulus onset, thereby omitting stimulus onset-related transient activity. These AR models were  
804 then used to generate surrogate time series.

805

## 806 **AR(2) Model Derivation.**

807

808 Let  $x_t$  be a stationary stochastic signal (which could represent an LFP signal, for example). The  
809 AR(2) model is defined by the second order difference equation:

$$810 \quad x_t = \beta_2 x_{t-1} + \beta_1 x_{t-2} + \varepsilon_t \quad (1)$$

811

812 with an expected value  $EV\{\varepsilon_t, \varepsilon_{t+k}\} = 0$  for all time delays  $k$  (i.e.  $\varepsilon_t$  is uncorrelated white noise). For  
813 a certain range of parameters, this model is a linear, dampened harmonic oscillator driven by  
814 stochastic noise. We now rewrite this second-order difference equation into the two corresponding  
815 first-order, linear differential equations. We first swap variables and define  $I = x_t$  and  $E = x_t - x_{t-1}$ .  
816 We then obtain the system of equations

817

$$818 \quad \begin{aligned} dI/dt &= w_{ie} E \\ 819 \quad dE/dt &= -w_{ee} E - w_{ei} I + \varepsilon_t \end{aligned} \quad (2)$$

820

821 Here  $w_{ei} = 1 - \beta_2 - \beta_1$  is the inhibitory feedback from  $I$  to  $E$ , and  $w_{ee} = 1 + \beta_1$  and  $w_{ie} = 1$ . The product  
822  $-w_{ee} E$  controls the return to the steady state, in the absence of stochastic noise input. Note that  
823 the model does not contain recurrent inhibitory or excitatory connections, and does not contain  
824 any non-linear interactions. It differs from the Wilson-Cowan or PING model because of the  
825 absence of non-linearities. But it is directly related to the linear noise approximation of the  
826 stochastic Wilson-Cowan model, with the difference that there are no recurrent excitatory or  
827 inhibitory connections in the AR(2) model. From the AR(2) model, we can obtain eigenvalues in  
828 the standard way, i.e. from the roots of the characteristic polynomial equation.

829 To generate AR(2) signals, we computed the AR(2) coefficients for a given eigenvalue  
830 magnitude (simply referred to as eigenvalue) and oscillation frequency, using standard analytical  
831 transformations. Generated time series were analyzed with the same cycle-detection method as  
832 the LFP data. The only difference was that for the AR(2), we did not divide the data into trials, and  
833 thus computed the correlation between cycle amplitude and duration across all the cycles over all  
834 the time points (i.e. not across trials for each time point separately). In order to compare the AR  
835 models to the LFP data, we ensured that the model used a sampling frequency of 2035 Hz, similar

836 to the sampling frequency of most of our LFP datasets. For several analyses, we correlated the  
837 eigenvalue of the AR(2) fit to the LFP data, with several correlation measures across LFP  
838 datasets, including the amplitude-duration correlation, amplitude autocorrelation and duration  
839 autocorrelation. To ensure that all preprocessing (sampling rate; filtering) was similar for these  
840 data, we only included datasets with a similar sampling frequency of 2034.51 Hz.

841  
842 **AR(2) Model Fit to LFP data.** We estimated the strength of gamma oscillations in our LFP  
843 data as follows: (1) We computed gamma-band power spectra separately for each channel and  
844 condition. The power spectra were based on rectangular windows of 1s, in order to ensure  
845 minimal spectral smoothing, and thus a more accurate fit. (2) We then estimated the coefficients  
846 of equivalent AR(2) models by minimizing the squared error in the gamma frequency-range  
847 (*matlab* function *fminsearch*) between each LFP power spectrum and the following function:

848  
849 
$$S(f) = \frac{\sigma_z^2}{1 + \varphi_1^2 + \varphi_2^2 - 2\varphi_1(1 - \varphi_2) \cos(2\pi f) - 2\varphi_2 \cos(4\pi f)}$$

850  
851 where  $S(f)$  is the power spectrum of the AR(2),  $\sigma_z$  is the standard deviation of this power spectrum,  
852  $f$  are frequencies in the gamma range, and  $\varphi_1/\varphi_2$  are the AR(2) coefficients (Fig. 8c). (3) We  
853 determined the eigenvalues of the equivalent AR(2) models (Figs 8d,f, 9c,f, Supplementary Figs  
854 5c, 6c).

855  
856 **PPC.** For the calculation of spike-LFP PPC, the gamma phase of each spike within a gamma  
857 cycle was defined as  $t/T * 2 * \pi$ , where  $t$  was the time of the spike relative to the start of the gamma  
858 cycle, and  $T$  was the duration of the gamma cycle. This constitutes a linear phase interpolation.  
859 This used the improved Hilbert-based definition of gamma half-cycles (cycles). The obtained spike  
860 phases from separate trials were collected, and the average consistency of phases across these  
861 pairs was estimated with the pairwise-phase-consistency metric (PPC)<sup>47,71</sup>, and more specifically  
862 its PPC1 variant<sup>71</sup>. Any potential bias due to differences in discharge rates is removed by the  
863 pairwise computation. Only neurons that fired at least 50 spikes were considered, because phase-  
864 locking estimates can have a high variance in cases of low spike counts. We were not able to  
865 perform this analysis for single-unit activity, due to the lack of a sufficient number of detected  
866 single unit spikes.

867  
868 **Computation of the Cycle-Based Amplitude Spectrum (CBAS) and cycle-frequency**  
869 **distribution.** For Fig. 5 and Supplementary Fig. 4 we computed the cycle-based amplitude  
870 spectrum (CBAS) and the cycle-frequency distribution as follows. Gamma half-cycle amplitude  
871 and duration values were extracted from the LFP through the use of the previously described  
872 improved detection algorithm. Values of gamma-half-cycle durations were converted into values  
873 of gamma-half-cycle frequency (frequency being the inverse of duration). This was done  
874 separately for each recording site and stimulus condition. Next, gamma half cycles were assigned  
875 to their corresponding frequency bin, and for each frequency bin, the average amplitude and the  
876 rate of incidence of that frequency were determined.

877           Note that the peak gamma-frequency varies across experimental subjects and stimulus  
878 conditions. In order to compute averages across stimulus conditions and monkeys, it is therefore  
879 necessary to align individual distributions to the power-spectral peak in the gamma-frequency-  
880 range, separately for each stimulus condition and dataset. We performed this alignment in the  
881 following way: The raw trial-wise power spectra were estimated separately for each stimulus  
882 condition as described above (see power), and from these spectra we determined the peak  
883 gamma-frequency. In addition, this was done for the baseline-corrected power spectra. The  
884 alignment of half-cycle amplitudes and frequency counts was then performed around the resulting  
885 frequency. Specifically, half-cycle amplitude and frequency count averages at  $\pm 20$  Hz around the  
886 gamma peak were averaged across stimulus conditions and datasets. Note that we analyzed  
887 datasets with different sampling rates. This entailed that the range of detectable half-cycle  
888 frequencies (i.e.  $\text{sampling rate}/(2 \cdot \text{duration})$ ) varied across different datasets and, depending on  
889 the sampling rate, certain frequency bins were necessarily empty. In order to average across  
890 datasets with different sampling rates, we therefore performed a linear interpolation between  
891 normalized half-cycle amplitude values and frequency counts, which were adjacent to empty bins.



## 892 Legends

893 **Figure | 1. Gamma dynamics in awake macaque V1 during visual stimulation.** (a) Raw LFP  
894 trace from one representative recording site from area V1 in monkey T before and during the  
895 presentation of a full-screen drifting grating. (b,c) Raw power (b) and power change relative to  
896 baseline (c), averaged across all selected recording sites from V1 in monkey T. The green and  
897 black traces in b correspond to the pre-stimulus baseline period and stimulation period  
898 respectively. The error regions show 2 standard errors of the mean (S.E.M.) based on a bootstrap  
899 procedure across trials (1000 bootstraps). (d) Power change relative to baseline, as function of  
900 frequency and time relative to stimulus onset, averaged over all selected V1 recording sites in  
901 monkey T before and during the presentation of a full-screen drifting grating. Note the changes in  
902 gamma amplitude and frequency with time after stimulus onset. (e) Time course of gamma-half-  
903 cycle amplitude (blue) and duration (red), averaged over all selected V1 recording sites in monkey  
904 T during the presentation of a full-screen drifting grating. The error regions show  $\pm 2$  SEM based  
905 on a bootstrap procedure. Only the stimulation period is shown, because only very few gamma  
906 cycles of very low amplitude were detected before stimulus onset. (f-j) Same as a-e, but for the  
907 presentation of a full-screen uniform color surface. (a,d,f,i) Dashed lines indicate stimulus onset.

908 **Figure | 2. Estimation of correlation between gamma-cycle amplitude and duration can be**  
909 **influenced by noise.** (a) LFP trace filtered in the gamma range (20-100 Hz). Red dots indicate  
910 local maxima and minima. (b) Segment of the trace in a demonstrating the definition of gamma-  
911 cycle amplitude and inter-event interval, i.e. gamma-cycle duration. (c) For each dataset listed on  
912 the x-axis, the three bars show the correlation between gamma-cycle amplitudes and the  
913 durations of the same gamma cycle (center, red), the previous gamma cycle (left, white) and the  
914 next gamma cycle (right, white). On the right, this is shown for the average across all datasets.  
915 This was calculated for the visual stimulation period. Amplitude and duration values were  
916 extracted as in <sup>31</sup>, including the filtering illustrated in (a, b); note that the employed subtraction of  
917 a boxcar-smoothed signal amounts to a high-pass-filtering at 20 Hz. For each dataset, a null  
918 distribution was produced by randomizing the order of duration values across trials, and the  
919 resulting means and 99.9% confidence intervals are shown as dots and vertical lines. For the  
920 average across datasets, shown on the right, we performed a t-test and show the resulting  
921 confidence intervals as vertical lines on the observed mean (red bar:  $p < 5 \cdot 10^{-5}$ , white bars for  
922 preceding cycle:  $p = 0.28$ , white bars for succeeding cycle:  $p = 0.56$ ). In addition, we performed a  
923 two-sided non-parametric permutation test (red bar:  $p < 0.05$ ; white bars:  $p > 0.05$ ). (d) Same as c  
924 but for the pre-stimulus baseline (averages across datasets: red bar:  $p = 4.51 \cdot 10^{-5}$ , t-test across  
925 datasets; white bars  $p = 0.011$  and  $p = 0.038$ , respectively for preceding and succeeding cycles, t-  
926 test across datasets) (e) Example synthetic colored noise trace filtered in the gamma range (20-  
927 100 Hz). Red dots indicate local maxima and minima. (f) Power spectra of synthetic colored noise  
928 signals with a spectral shape of  $1/f^n$ , with  $n$  assuming values from 0 (dark blue) to 2 (bright yellow).  
929 (g) Correlation of the amplitude and duration of individual deflections in synthetic colored noise  
930 signals. Dots and vertical lines indicate means  $\pm 2$  SEM produced by a bootstrap procedure (1000  
931 bootstraps). The color conventions are the same as in f.

932 **Figure | 3. Illustration of a method for the selection of gamma-oscillatory epochs.** (a) LFP  
933 trace displayed in **Fig. 1a**, with regions presented in red corresponding to gamma epochs passing  
934 the criterion for stationarity. (b) Phase of the analytic signal based on the Hilbert transform of the  
935 trace shown in **a**. (c) Angular velocity of **a**. Note periods of positive and relatively stable angular  
936 velocity, corresponding to oscillatory gamma epochs in the original LFP. (a-c) Dashed lines  
937 indicate stimulus onset. (d) Magnification of the designated section of the LFP trace and its phase.  
938 Red dots indicate detected LFP peaks and troughs. Vertical dashed lines designate  
939 negative- to- positive and positive-to-negative zero crossings of the phase of the analytic signal,  
940 whereas horizontal dashed lines designate 0. (e) The correlation between the amplitude of a  
941 gamma half- cycle and the duration of the same gamma half cycle for different additive noise  
942 levels, computed with the method used in **Fig. 2** (black), and the method described in this figure  
943 (red). The error regions show  $\pm 2$  SEM based on a bootstrap procedure.

944 **Figure | 4. Gamma-half-cycle amplitudes and durations are positively correlated in gamma-**  
945 **oscillatory epochs.** (a) For each dataset listed on the x-axis, the three bars show the correlation  
946 between the amplitude of a gamma half cycle and the duration of the same (center, red), previous  
947 (left, white) and next (right, white) gamma half cycle. On the right, this is shown for the average  
948 across all datasets. This was calculated for each time point across trials and averaged across  
949 time points for gamma-oscillatory epochs. The data used correspond to the period during the  
950 presentation of the visual stimulus. For individual datasets, a null distribution was produced by  
951 randomizing the order of duration values across trials, and the resulting means and 99.9%  
952 confidence intervals are shown as dots and vertical lines. For the average across datasets, shown  
953 on the right, we performed a t-test and show the resulting confidence intervals as vertical lines on  
954 the observed mean (red bar:  $p < 6 \times 10^{-3}$ , white bars for preceding cycle:  $p = 0.5$ , white bars for  
955 succeeding cycle:  $p = 0.35$ ). In addition we performed a two-sided non-parametric permutation test  
956 (red bar:  $p < 0.05$ ; white bars:  $p > 0.05$ ). (b) Correlation between the amplitude of a gamma half-  
957 cycle and the duration of gamma half-cycles before and after it for 3 different datasets. Note that  
958 in monkey I, this is limited to  $\pm 2$  cycles, because the signal-to-noise ratio was lower, resulting in  
959 shorter gamma-oscillatory epochs. Importantly, all three example datasets show a central peak,  
960 despite the fact that they show different longer-term correlations. The gray lines and gray-shaded  
961 areas depict the means and 99.9% confidence regions, after randomizing the order of duration  
962 values across trials. (c) Same as **a**, but showing the correlations between residuals of the  
963 regression across adjacent amplitude triplets and the residuals of the regression across adjacent  
964 duration triplets (red bar:  $p = 23 \times 10^{-4}$ , t-test across datasets;  $p < 0.05$ , permutation test for individual  
965 datasets; white bars  $p = 0.066$  and  $p = 0.97$ , respectively for preceding and succeeding cycles, t-  
966 test across datasets;  $p > 0.05$ , permutation test for individual datasets).

967 **Figure | 5. Cycle-based amplitude-spectra and cycle-frequency distributions.** (a) The x-axis  
968 shows duration expressed as its inverse, namely frequency, and after aligning to the gamma peak  
969 in the raw power spectrum (black trace). The blue curve shows the gamma-half-cycle amplitudes  
970 as a function of their duration. The red curve shows the count of detected gamma half-cycles as  
971 a function of their duration. These analyses were based on the broadband signal from the last

972 250 ms of stimulation (see Methods). Error regions show  $\pm 2$  SEM based on a bootstrap  
973 procedure. (b) Same as a, but for gamma epochs detected on the filtered LFP.

974 **Figure | 6. The relationship between gamma-cycle duration and spiking.** (a) The blue curve  
975 depicts the average normalized multi-unit (MU) spike count in detected gamma cycles of different  
976 durations, expressed on the x-axis as frequencies, for monkey J (left) and monkey L (right). The  
977 black curve depicts raw power in the gamma range of the respective monkeys. Error regions show  
978  $\pm 2$  SEM across units. (b) Same as a, but using the normalized MU firing rate. (c) Same as a, but  
979 showing the normalized change in spike-LFP PPC. (d) Correlation between the gamma-cycle  
980 duration, expressed as frequency, and several spiking metrics, separately for the two monkeys (J  
981 and L). Vertical lines depict  $\pm 2$  SEM across units.

982 **Figure | 7. The modulation of spiking activity by the phase of the gamma cycle.** (a) The  
983 colormap shows the modulation of the MU firing rate as a function of gamma-cycle duration (y-  
984 axis) and the phase in the gamma cycle, at which spikes occurred (x-axis). (b) Difference in  
985 normalized firing rate between short and long gamma cycles for the preferred (left bar) and non-  
986 preferred phase in gamma cycles (right bar). Vertical lines depict  $\pm 2$  SEM across units. Data from  
987 monkey J and monkey L are shown in the left and right column, respectively.

988 **Figure | 8. A linear harmonic oscillator driven by noise reproduces the correlation between**  
989 **cycle-amplitude and duration in the LFP data.** (a; upper panel) Synthetic trace generated from  
990 a second-order autoregressive model (AR(2)). (a; lower panel). From the AR(2), we derived the  
991 excitatory component (red) and inhibitory component (blue) of a linear PING model with the same  
992 peak frequency and eigenvalue as the AR(2) model (see Methods). Note the characteristic delay  
993 between excitation and inhibition. (b) Power spectra of synthetic signals generated from AR(2)  
994 processes with corresponding eigenvalues ranging from 0.9 (dark blue) to 0.999 (bright yellow).  
995 Note that we used a periodogram with a rectangular taper, in order to minimize the spectral  
996 leakage around the peak; this can introduce an amount of broad-band leakage. (c) Black: The  
997 change in LFP power relative to baseline as a function of frequency (Hz), for an example site in  
998 monkey T during the presentation of a full-screen drifting grating. Red: Power spectrum of a  
999 synthetic signal generated by an AR(2) model. The AR(2) model was fitted to the LFP spectrum  
1000 shown in black (see Methods). Green: Power spectrum of the I component of a linear PING model  
1001 which is equivalent to the AR(2) model. (d) Histogram of eigenvalues corresponding to AR(2)  
1002 model fits of the LFP data. (e) Correlation between the amplitude of a gamma half-cycle and the  
1003 duration of 10 gamma half-cycles before and after it. These correlation coefficients were  
1004 computed for synthetic signals generated from AR(2) processes with corresponding eigenvalues  
1005 ranging from 0.9 (dark blue) to 0.999 (bright yellow) in steps of approximately 0.01. The error  
1006 regions show  $\pm 2$  SEM based on a bootstrap procedure. (f) Scatter plot of the eigenvalues  
1007 displayed in d and the instantaneous correlation between gamma half-cycle amplitude and  
1008 duration from the corresponding LFP data. The regression fit (black line) was computed with the  
1009 least-squares method. (g-i) Same as Fig. 5a, but for synthetic signals generated from AR(2)  
1010 processes with respective eigenvalues of 0.9 (g), 0.9871 (h; same as median of d), and 0.999 (i).

1011 **Figure | 9. A linear harmonic oscillator reproduces gamma-cycle amplitude and duration**  
1012 **autocorrelations in the LFP.** (a) The correlation between the amplitude of a given gamma half-  
1013 cycle and the 10 gamma half-cycles before and after it (i.e. the autocorrelation) for synthetic  
1014 signals generated from AR(2) processes. The error regions show  $\pm 2$  SEM based on a bootstrap  
1015 procedure. (b) The autocorrelation for LFP data from monkey T during presentation of a full-  
1016 screen drifting grating. The gray lines and gray-shaded areas depict the means and  
1017 99.9% confidence regions, after randomizing the order of duration values across trials. (c) Same  
1018 as **Fig. 6c**, but now showing the correlation between the amplitude of a given gamma half- cycle  
1019 and the amplitude of its preceding and succeeding half-cycle, pooling data points from multiple  
1020 datasets, conditions and channels. (d-f) Same as **a-c** but for gamma full-cycle durations.

1021 **Supplementary Figure | 1. Gamma-full-cycle amplitudes and durations are positively**  
1022 **correlated.** (a) Same as **Fig. 4a**, but using full gamma cycles (averages across datasets: red bar:  
1023  $p=0.011$ , t-test across datasets;  $p<0.05$ , two-sided randomization test across datasets; white bars  
1024  $p=0.13$  and  $p=0.9$ , respectively for preceding and succeeding cycles, t-test across datasets;  
1025  $p>0.05$ , two-sided randomization test across datasets). (b) Same as **Fig. 4c**, but using full gamma  
1026 cycles (averages across datasets: red bar:  $p=0.008$ , t-test across datasets; white bars  $p=0.15$  and  
1027  $p=0.51$ , respectively for preceding and succeeding cycles, t-test across datasets). (c) Same as  
1028 **Supplementary Figure 2c**, but using full gamma cycles (averages across datasets: red bar:  
1029  $p=0.046$ , t-test across datasets; white bars  $p=0.11$  and  $p=0.13$ , respectively for preceding and  
1030 succeeding cycles, t-test across datasets). (d) Same as **Supplementary Figure 3e**, but using full  
1031 gamma cycles (averages across datasets: red bar:  $p=0.041$ , t-test across datasets; white bars  
1032  $p=0.9$  and  $p=0.7$ , respectively for preceding and succeeding cycles, t-test across datasets).

1033 **Supplementary Figure | 2. The effect of microsaccades on the correlation between gamma-**  
1034 **half-cycle amplitudes and durations.** (a) Time-frequency power averaged over all selected V1  
1035 recording sites in monkey T during the presentation of a full-screen drifting grating, normalized by  
1036 the pre-stimulus baseline. X-axis shows time relative to detected microsaccades (MSs). (b) Time-  
1037 course of the gamma-half-cycle amplitude (blue) and duration (red) of the data depicted in **a**. Error  
1038 regions show  $\pm 2$  SEM based on a bootstrap over MSs. (c) Same as **Fig. 4c**, but after the removal  
1039 of 250 ms epochs following the occurrence of MSs for all available datasets (averages across  
1040 datasets: red bar:  $p=0.02$ , t-test across datasets; white bars  $p=0.07$  and  $p=0.97$ , respectively for  
1041 preceding and succeeding cycles, t-test across datasets).

1042 **Supplementary Figure | 3. Correlation of gamma-half-cycle amplitudes and durations in an**  
1043 **AR model of the visual stimulation period.** Panels (a-d) are based on signals generated by an  
1044 autoregressive (AR) model of the data used in **Fig. 1a-d**, for the visual-stimulation period,  
1045 averaged over all selected V1 sites. We refer to the synthetic LFP signal generated by the AR  
1046 model as AR-based LFP. (a) Representative AR-based LFP. Regions presented in red  
1047 correspond to gamma epochs passing the criterion for stationarity. (b) Average raw power of the  
1048 measured (black) and the AR-based LFP (red). (c) Time-frequency power of AR-based LFP. Note  
1049 the expected absence of temporal trends. (d) Time-course of gamma-half-cycle amplitude (blue)  
1050 and duration (red) of AR-based LFP. Error regions show  $\pm 2$  SEM based on a bootstrap procedure.

1051 (e) Same as **Fig. 4a**, but for the AR-based LFP (averages across datasets: red bar:  $p=0.03$ , t-test  
1052 across datasets; white bars  $p=0.98$  and  $p=0.2$ , respectively for preceding and succeeding cycles,  
1053 t-test across datasets).

1054 **Supplementary Figure | 4. Cycle-based spectra of amplitudes and rates of incidence. (a)**  
1055 Same as **Fig. 5a**, and **(b)** same as **Fig. 5b**, but after aligning to the gamma peak in the power-  
1056 change spectrum.

1057 **Supplementary Figure | 5. A linear harmonic oscillator driven by noise reproduces LFP**  
1058 **gamma-cycle amplitude autocorrelations estimated for full-cycles. (a,b)** Same as,  
1059 respectively, **Fig. 9a** and **Fig. 9c**, but for full gamma cycles.

1060 **Supplementary Figure | 6. A linear harmonic oscillator driven by noise reproduces LFP**  
1061 **gamma-cycle duration autocorrelations estimated for half-cycles. (a-c)** Same as **Fig. 9d-f**,  
1062 but for gamma half-cycles.

1063

1064

1065

## References

1066

1067 1. Singer W, Gray CM. Visual feature integration and the temporal correlation hypothesis.  
1068 *Annu Rev Neurosci* **18**, 555-586 (1995).

1069

1070 2. Pesaran B, Pezaris JS, Sahani M, Mitra PP, Andersen RA. Temporal structure in neuronal  
1071 activity during working memory in macaque parietal cortex. *Nat Neurosci* **5**, 805-811  
1072 (2002).

1073

1074 3. Roelfsema PR, Lamme VA, Spekreijse H. Synchrony and covariation of firing rates in the  
1075 primary visual cortex during contour grouping. *Nat Neurosci* **7**, 982-991 (2004).

1076

1077 4. Colgin LL, *et al.* Frequency of gamma oscillations routes flow of information in the  
1078 hippocampus. *Nature* **462**, 353-357 (2009).

1079

1080 5. Tiesinga P, Sejnowski TJ. Cortical enlightenment: are attentional gamma oscillations  
1081 driven by ING or PING? *Neuron* **63**, 727-732 (2009).

1082

1083 6. Chalk M, Herrero JL, Gieselmann MA, Delicato LS, Gotthardt S, Thiele A. Attention  
1084 reduces stimulus-driven gamma frequency oscillations and spike field coherence in V1.  
1085 *Neuron* **66**, 114-125 (2010).

1086

1087 7. Burns SP, Xing D, Shapley RM. Is gamma-band activity in the local field potential of V1  
1088 cortex a "clock" or filtered noise? *J Neurosci* **31**, 9658-9664 (2011).

1089

1090 8. Nikolic D, Fries P, Singer W. Gamma oscillations: precise temporal coordination without  
1091 a metronome. *Trends Cogn Sci* **17**, 54-55 (2013).

1092

1093 9. Akam TE, Kullmann DM. Efficient "communication through coherence" requires  
1094 oscillations structured to minimize interference between signals. *PLoS Comput Biol* **8**,  
1095 e1002760 (2012).

1096

1097 10. Buzsáki G, Wang XJ. Mechanisms of gamma oscillations. *Annu Rev Neurosci* **35**, 203-  
1098 225 (2012).

- 1099
- 1100 11. Brunet N, Vinck M, Bosman CA, Singer W, Fries P. Gamma or no gamma, that is the  
1101 question. *Trends Cogn Sci* **18**, 507-509 (2014).
- 1102
- 1103 12. Schomburg EW, *et al.* Theta phase segregation of input-specific gamma patterns in  
1104 entorhinal-hippocampal networks. *Neuron* **84**, 470-485 (2014).
- 1105
- 1106 13. Fries P. Rhythms for Cognition: Communication through Coherence. *Neuron* **88**, 220-235  
1107 (2015).
- 1108
- 1109 14. Hermes D, Miller KJ, Wandell BA, Winawer J. Stimulus Dependence of Gamma  
1110 Oscillations in Human Visual Cortex. *Cereb Cortex* **25**, 2951-2959 (2015).
- 1111
- 1112 15. Ray S, Maunsell JH. Do gamma oscillations play a role in cerebral cortex? *Trends Cogn  
1113 Sci* **19**, 78-85 (2015).
- 1114
- 1115 16. Lundqvist M, Rose J, Herman P, Brincat SL, Buschman TJ, Miller EK. Gamma and Beta  
1116 Bursts Underlie Working Memory. *Neuron* **90**, 152-164 (2016).
- 1117
- 1118 17. Vinck M, Bosman CA. More Gamma More Predictions: Gamma-Synchronization as a Key  
1119 Mechanism for Efficient Integration of Classical Receptive Field Inputs with Surround  
1120 Predictions. *Front Syst Neurosci* **10**, 35 (2016).
- 1121
- 1122 18. Palmigiano A, Geisel T, Wolf F, Battaglia D. Flexible information routing by transient  
1123 synchrony. *Nat Neurosci* **20**, 1014-1022 (2017).
- 1124
- 1125 19. Cardin JA. Snapshots of the Brain in Action: Local Circuit Operations through the Lens of  
1126 gamma Oscillations. *J Neurosci* **36**, 10496-10504 (2016).
- 1127
- 1128 20. Sohal VS. How Close Are We to Understanding What (if Anything) gamma Oscillations  
1129 Do in Cortical Circuits? *J Neurosci* **36**, 10489-10495 (2016).
- 1130
- 1131 21. Freeman WJ. *Mass Action in the Nervous System*. Academic Press (1975).

- 1132
- 1133 22. Varela F, Lachaux JP, Rodriguez E, Martinerie J. The brainweb: phase synchronization  
1134 and large-scale integration. *Nat Rev Neurosci* **2**, 229-239 (2001).
- 1135
- 1136 23. Buzsáki G. *Rhythms of the Brain*. Oxford University Press (2005).
- 1137
- 1138 24. Lima B, Singer W, Chen NH, Neuenschwander S. Synchronization dynamics in response  
1139 to plaid stimuli in monkey V1. *Cereb Cortex* **20**, 1556-1573 (2010).
- 1140
- 1141 25. Ray S, Maunsell JH. Differences in gamma frequencies across visual cortex restrict their  
1142 possible use in computation. *Neuron* **67**, 885-896 (2010).
- 1143
- 1144 26. Lowet E, Roberts MJ, Bosman CA, Fries P, De Weerd P. Areas V1 and V2 show  
1145 microsaccade-related 3-4-Hz covariation in gamma power and frequency. *Eur J Neurosci*  
1146 **43**, 1286-1296 (2016).
- 1147
- 1148 27. Perrenoud Q, Pennartz CM, Gentet LJ. Membrane Potential Dynamics of Spontaneous  
1149 and Visually Evoked Gamma Activity in V1 of Awake Mice. *PLoS Biol* **14**, e1002383  
1150 (2016).
- 1151
- 1152 28. Lowet E, Roberts MJ, Peter A, Gips B, De Weerd P. A quantitative theory of gamma  
1153 synchronization in macaque V1. *Elife* **6**, (2017).
- 1154
- 1155 29. Lowet E, Gips B, Roberts MJ, De Weerd P, Jensen O, van der Eerden J. Microsaccade-  
1156 rhythmic modulation of neural synchronization and coding within and across cortical areas  
1157 V1 and V2. *PLoS Biol* **16**, e2004132 (2018).
- 1158
- 1159 30. Sohal VS, Zhang F, Yizhar O, Deisseroth K. Parvalbumin neurons and gamma rhythms  
1160 enhance cortical circuit performance. *Nature* **459**, 698-702 (2009).
- 1161
- 1162 31. Atallah BV, Scanziani M. Instantaneous modulation of gamma oscillation frequency by  
1163 balancing excitation with inhibition. *Neuron* **62**, 566-577 (2009).
- 1164



- 1165 32. Traub RD, Whittington MA, Colling SB, Buzsáki G, Jefferys JG. Analysis of gamma  
1166 rhythms in the rat hippocampus in vitro and in vivo. *The Journal of physiology* **493 ( Pt 2)**,  
1167 471-484 (1996).  
1168
- 1169 33. Shu Y, Hasenstaub A, McCormick DA. Turning on and off recurrent balanced cortical  
1170 activity. *Nature* **423**, 288-293 (2003).  
1171
- 1172 34. Wehr M, Zador AM. Balanced inhibition underlies tuning and sharpens spike timing in  
1173 auditory cortex. *Nature* **426**, 442-446 (2003).  
1174
- 1175 35. Okun M, Lampl I. Instantaneous correlation of excitation and inhibition during ongoing and  
1176 sensory-evoked activities. *Nat Neurosci* **11**, 535-537 (2008).  
1177
- 1178 36. Wang XJ. Neurophysiological and computational principles of cortical rhythms in  
1179 cognition. *Physiol Rev* **90**, 1195-1268 (2010).  
1180
- 1181 37. Vinck M, Womelsdorf T, Buffalo EA, Desimone R, Fries P. Attentional modulation of cell-  
1182 class-specific gamma-band synchronization in awake monkey area v4. *Neuron* **80**, 1077-  
1183 1089 (2013).  
1184
- 1185 38. Onorato I, *et al.* A Distinct Class of Bursting Neurons with Strong Gamma Synchronization  
1186 and Stimulus Selectivity in Monkey V1. *Neuron* **105**, 180-197 e185 (2020).  
1187
- 1188 39. Jia X, Xing D, Kohn A. No consistent relationship between gamma power and peak  
1189 frequency in macaque primary visual cortex. *J Neurosci* **33**, 17-25 (2013).  
1190
- 1191 40. Roberts MJ, *et al.* Robust gamma coherence between macaque V1 and V2 by dynamic  
1192 frequency matching. *Neuron* **78**, 523-536 (2013).  
1193
- 1194 41. Shirhatti V, Ray S. Long-wavelength (reddish) hues induce unusually large gamma  
1195 oscillations in the primate primary visual cortex. *Proc Natl Acad Sci U S A* **115**, 4489-4494  
1196 (2018).  
1197
- 1198 42. Peter A, *et al.* Surface color and predictability determine contextual modulation of V1 firing  
1199 and gamma oscillations. *Elife* **8**, (2019).

- 1200
- 1201 43. Brunet NM, *et al.* Stimulus repetition modulates gamma-band synchronization in primate  
1202 visual cortex. *Proc Natl Acad Sci U S A* **111**, 3626-3631 (2014).
- 1203
- 1204 44. Vinck M, Batista-Brito R, Knoblich U, Cardin JA. Arousal and locomotion make distinct  
1205 contributions to cortical activity patterns and visual encoding. *Neuron* **86**, 740-754 (2015).
- 1206
- 1207 45. Gray CM, McCormick DA. Chattering cells: superficial pyramidal neurons contributing to  
1208 the generation of synchronous oscillations in the visual cortex. *Science* **274**, 109-113  
1209 (1996).
- 1210
- 1211 46. Mitchell JF, Sundberg KA, Reynolds JH. Differential attention-dependent response  
1212 modulation across cell classes in macaque visual area V4. *Neuron* **55**, 131-141 (2007).
- 1213
- 1214 47. Vinck M, van Wingerden M, Womelsdorf T, Fries P, Pennartz CM. The pairwise phase  
1215 consistency: a bias-free measure of rhythmic neuronal synchronization. *Neuroimage* **51**,  
1216 112-122 (2010).
- 1217
- 1218 48. Freeman WJ. Linear approximation of prepyriform evoked potential in cats. *Exp Neurol* **5**,  
1219 477-499 (1962).
- 1220
- 1221 49. Gersch W, Yonemoto J, Naitoh P. Automatic classification of multivariate EEGs using an  
1222 amount of information measure and the eigenvalues of parametric time series model  
1223 features. *Comput Biomed Res* **10**, 297-318 (1977).
- 1224
- 1225 50. Franaszczuk PJ, Blinowska KJ. Linear model of brain electrical activity--EEG as a  
1226 superposition of damped oscillatory modes. *Biol Cybern* **53**, 19-25 (1985).
- 1227
- 1228 51. Davis ZW, Muller L, Martinez-Trujillo J, Sejnowski T, Reynolds JH. Spontaneous Traveling  
1229 Cortical Waves Gate Perception in Awake Behaving Primates. *bioRxiv*, (2019).
- 1230
- 1231 52. Börgers C, Kopell N. Synchronization in networks of excitatory and inhibitory neurons with  
1232 sparse, random connectivity. *Neural computation* **15**, 509-538 (2003).
- 1233

- 1234 53. Csicsvari J, Jamieson B, Wise KD, Buzsáki G. Mechanisms of gamma oscillations in the  
1235 hippocampus of the behaving rat. *Neuron* **37**, 311-322 (2003).  
1236
- 1237 54. Hasenstaub A, Shu Y, Haider B, Kraushaar U, Duque A, McCormick DA. Inhibitory  
1238 postsynaptic potentials carry synchronized frequency information in active cortical  
1239 networks. *Neuron* **47**, 423-435 (2005).  
1240
- 1241 55. Salkoff DB, Zagha E, Yuzgec O, McCormick DA. Synaptic Mechanisms of Tight Spike  
1242 Synchrony at Gamma Frequency in Cerebral Cortex. *J Neurosci* **35**, 10236-10251 (2015).  
1243
- 1244 56. Tiesinga PH, Fellous JM, Jose JV, Sejnowski TJ. Computational model of carbachol-  
1245 induced delta, theta, and gamma oscillations in the hippocampus. *Hippocampus* **11**, 251-  
1246 274 (2001).  
1247
- 1248 57. Siegle JH, Pritchett DL, Moore CI. Gamma-range synchronization of fast-spiking  
1249 interneurons can enhance detection of tactile stimuli. *Nat Neurosci* **17**, 1371-1379 (2014).  
1250
- 1251 58. Vinck M, *et al.* Cell-Type and State-Dependent Synchronization among Rodent  
1252 Somatosensory, Visual, Perirhinal Cortex, and Hippocampus CA1. *Front Syst Neurosci* **9**,  
1253 187 (2015).  
1254
- 1255 59. Veit J, Hakim R, Jadi MP, Sejnowski TJ, Adesnik H. Cortical gamma band synchronization  
1256 through somatostatin interneurons. *Nat Neurosci* **20**, 951-959 (2017).  
1257
- 1258 60. Spyropoulos G, Bosman CA, Fries P. A theta rhythm in macaque visual cortex and its  
1259 attentional modulation. *Proc Natl Acad Sci U S A* **115**, E5614-E5623 (2018).  
1260
- 1261 61. Powanwe AS, Longtin A. Determinants of Brain Rhythm Burst Statistics. *Sci Rep* **9**, 18335  
1262 (2019).  
1263
- 1264 62. Wallace E, Benayoun M, van Drongelen W, Cowan JD. Emergent oscillations in networks  
1265 of stochastic spiking neurons. *PLoS One* **6**, e14804 (2011).  
1266
- 1267 63. Burns SP, Xing D, Shapley RM. Comparisons of the dynamics of local field potential and  
1268 multiunit activity signals in macaque visual cortex. *J Neurosci* **30**, 13739-13749 (2010).

- 1269
- 1270 64. Rubehn B, Bosman C, Oostenveld R, Fries P, Stieglitz T. A MEMS-based flexible  
1271 multichannel ECoG-electrode array. *J Neural Eng* **6**, 036003 (2009).
- 1272
- 1273 65. Bosman CA, *et al.* Attentional stimulus selection through selective synchronization  
1274 between monkey visual areas. *Neuron* **75**, 875-888 (2012).
- 1275
- 1276 66. Lewis CM, Bosman CA, Womelsdorf T, Fries P. Stimulus-induced visual cortical networks  
1277 are recapitulated by spontaneous local and interareal synchronization. *Proc Natl Acad Sci*  
1278 *U S A* **113**, E606-615 (2016).
- 1279
- 1280 67. Wang P, Nikolić D. An LCD Monitor with Sufficiently Precise Timing for Research in Vision.  
1281 *Frontiers in human neuroscience* **5**, 85 (2011).
- 1282
- 1283 68. Oostenveld R, Fries P, Maris E, Schoffelen JM. FieldTrip: Open source software for  
1284 advanced analysis of MEG, EEG, and invasive electrophysiological data. *Computational*  
1285 *intelligence and neuroscience* **2011**, 156869 (2011).
- 1286
- 1287 69. Schmitzer-Torbert N, Jackson J, Henze D, Harris K, Redish AD. Quantitative measures of  
1288 cluster quality for use in extracellular recordings. *Neuroscience* **131**, 1-11 (2005).
- 1289
- 1290 70. Muller L, Reynaud A, Chavane F, Destexhe A. The stimulus-evoked population response  
1291 in visual cortex of awake monkey is a propagating wave. *Nat Commun* **5**, 3675 (2014).
- 1292
- 1293 71. Vinck M, Battaglia FP, Womelsdorf T, Pennartz C. Improved measures of phase-coupling  
1294 between spikes and the Local Field Potential. *J Comput Neurosci* **33**, 53-75 (2012).
- 1295
- 1296

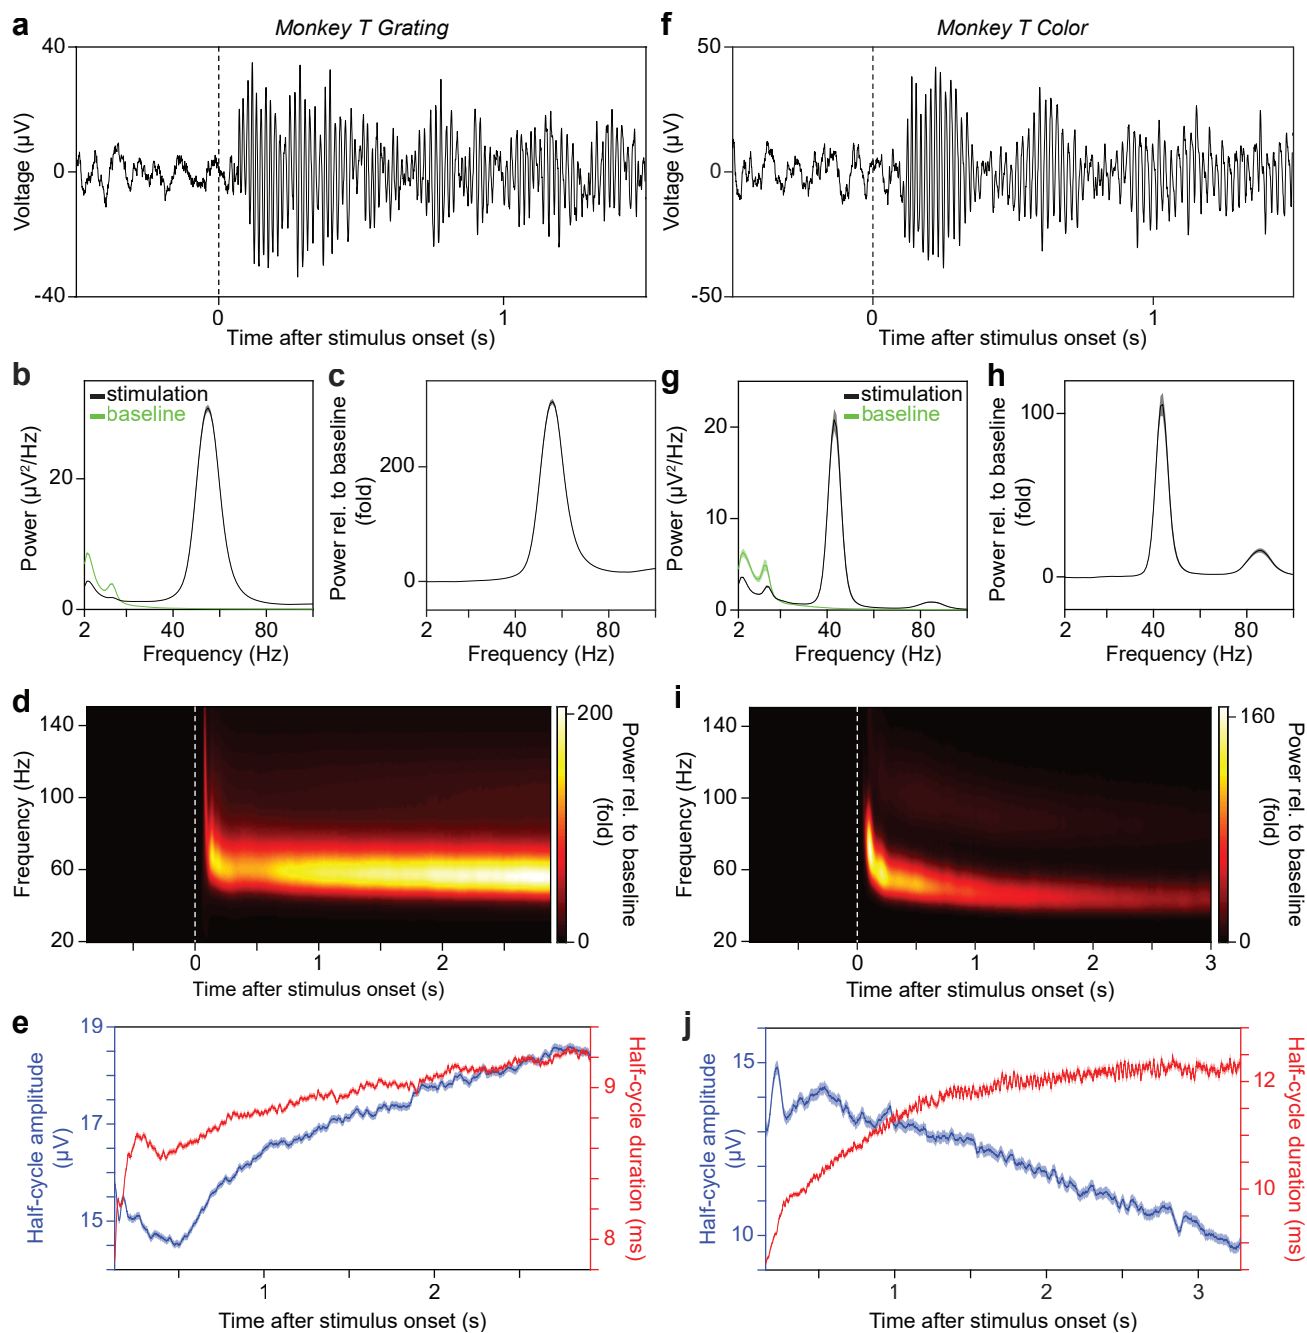

**Figure 1**

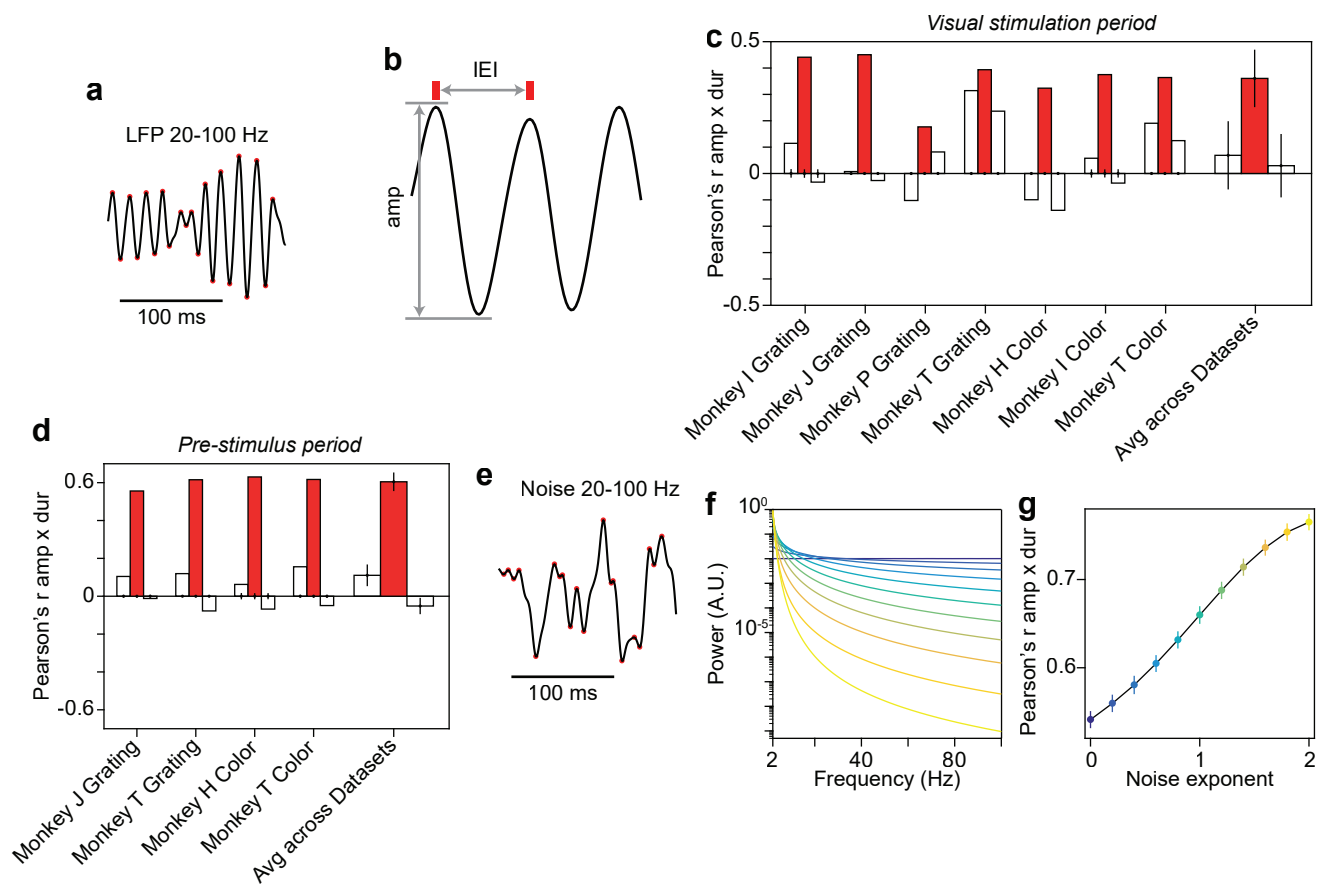

Figure 2

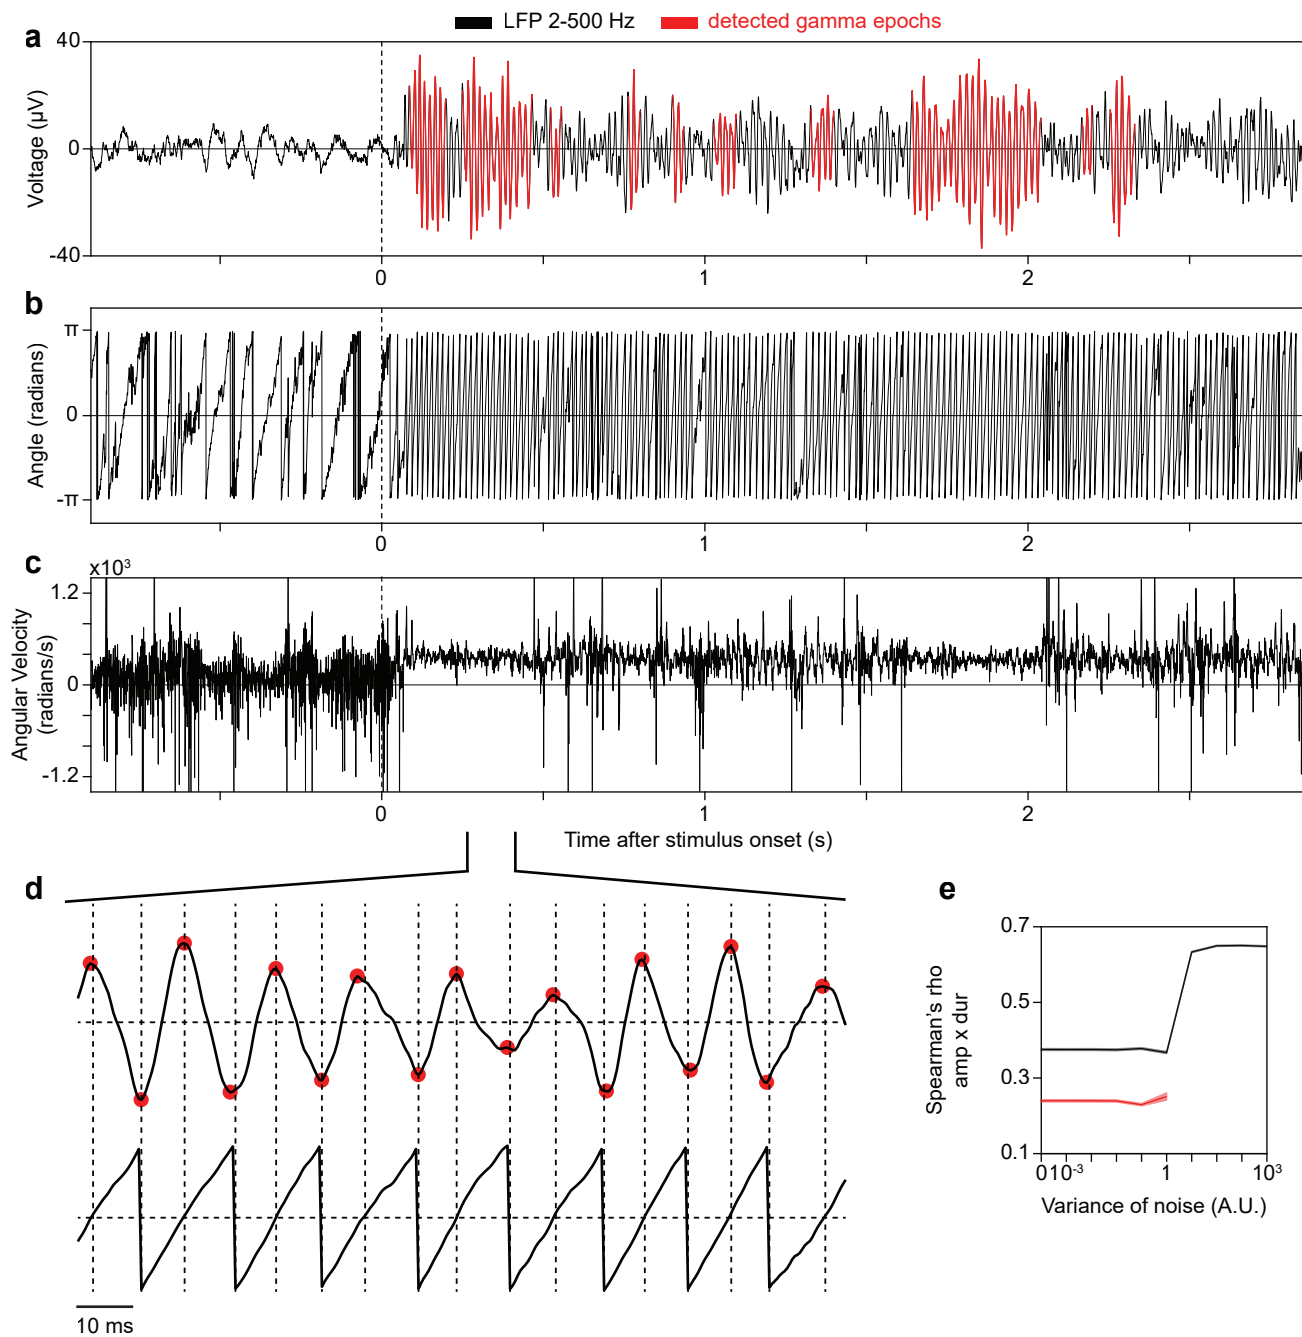

**Figure 3**

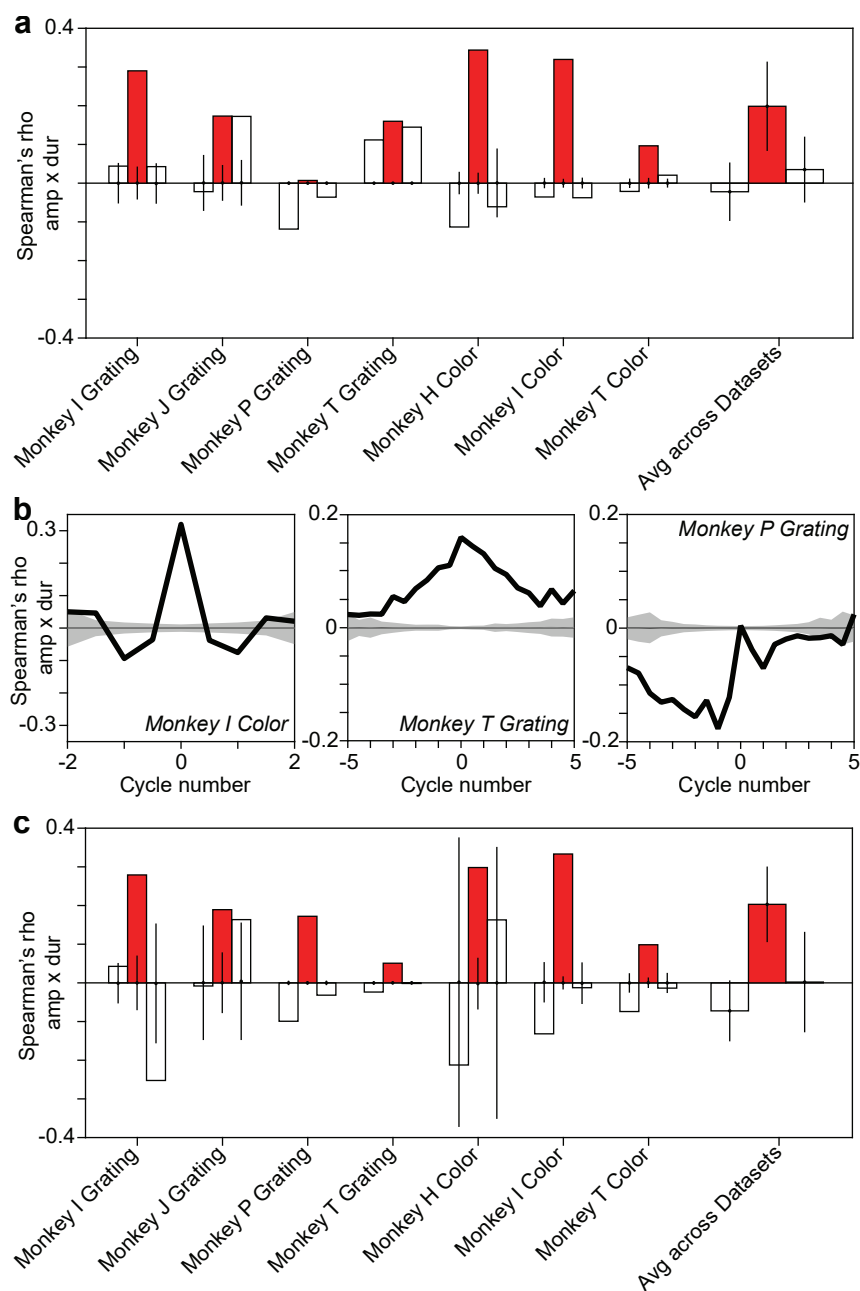

**Figure 4**



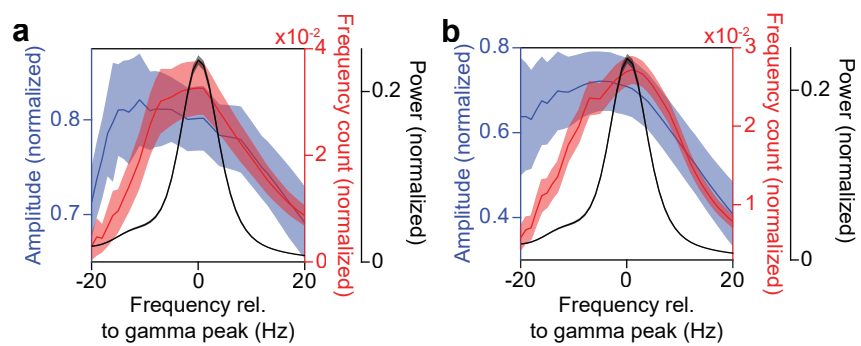

**Figure 5**

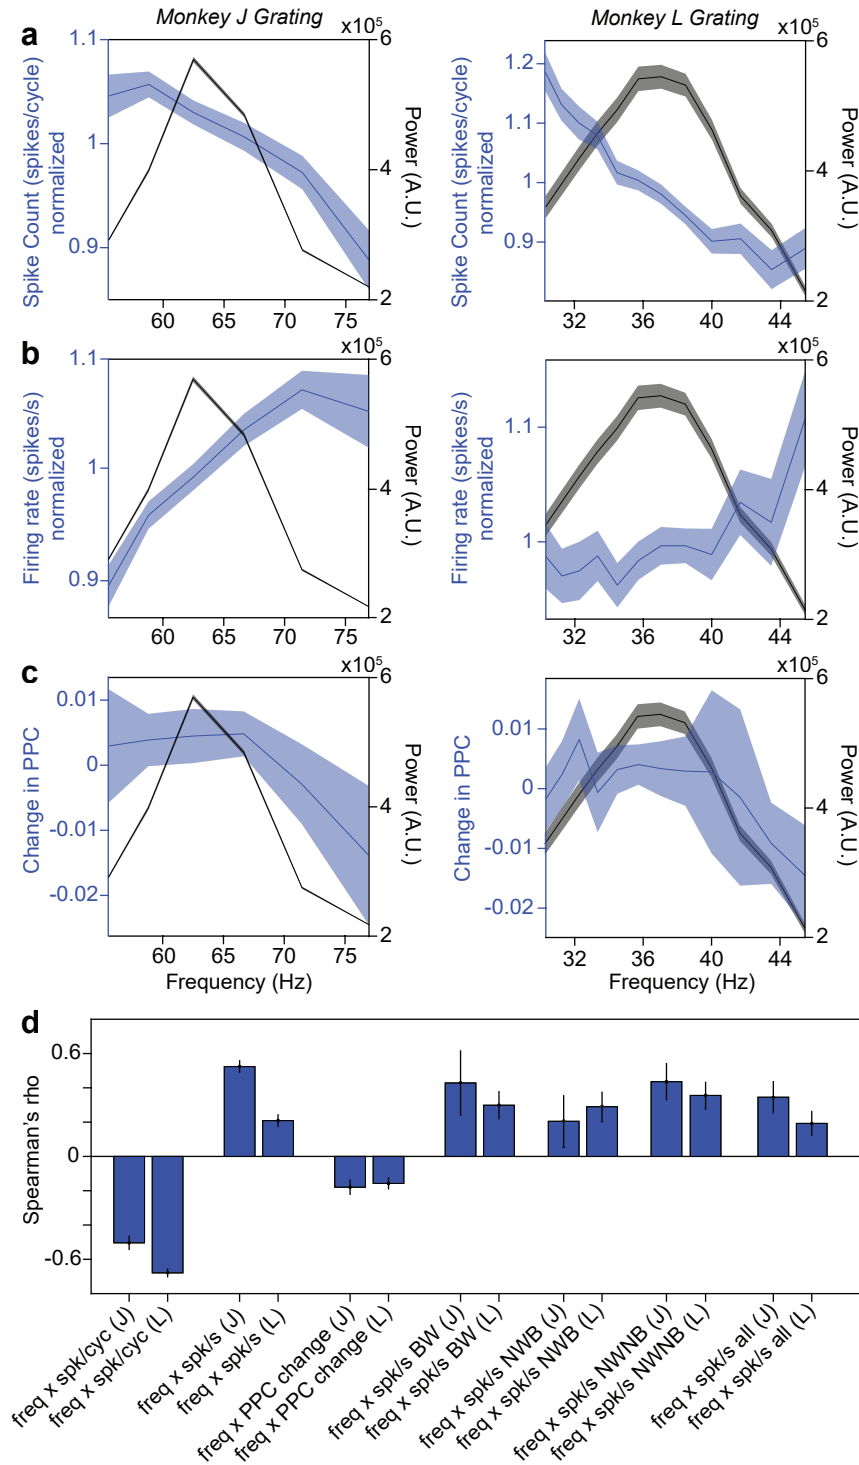

**Figure 6**

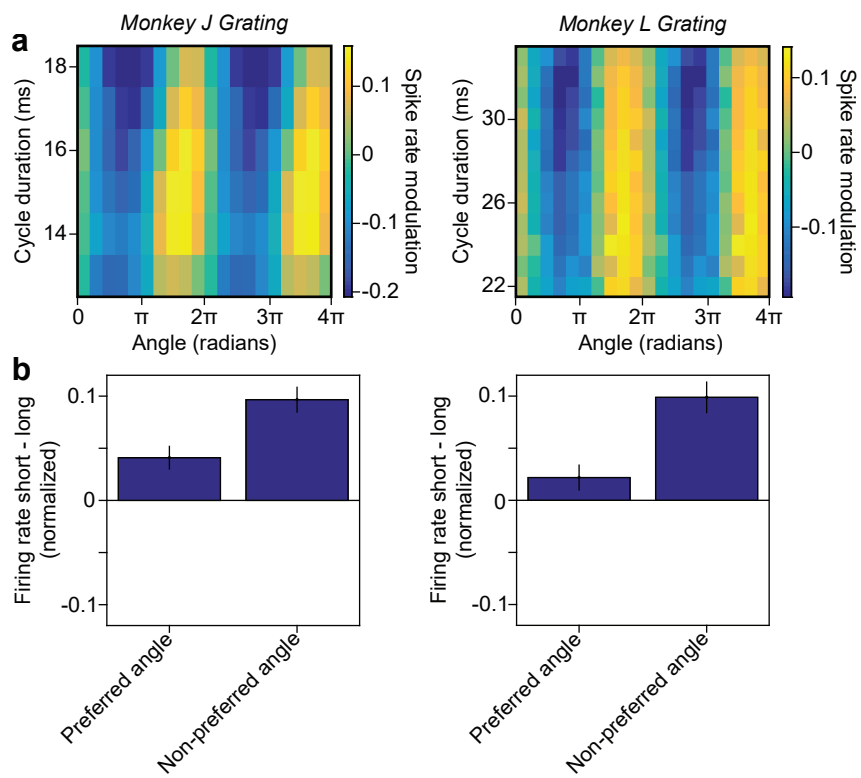

**Figure 7**

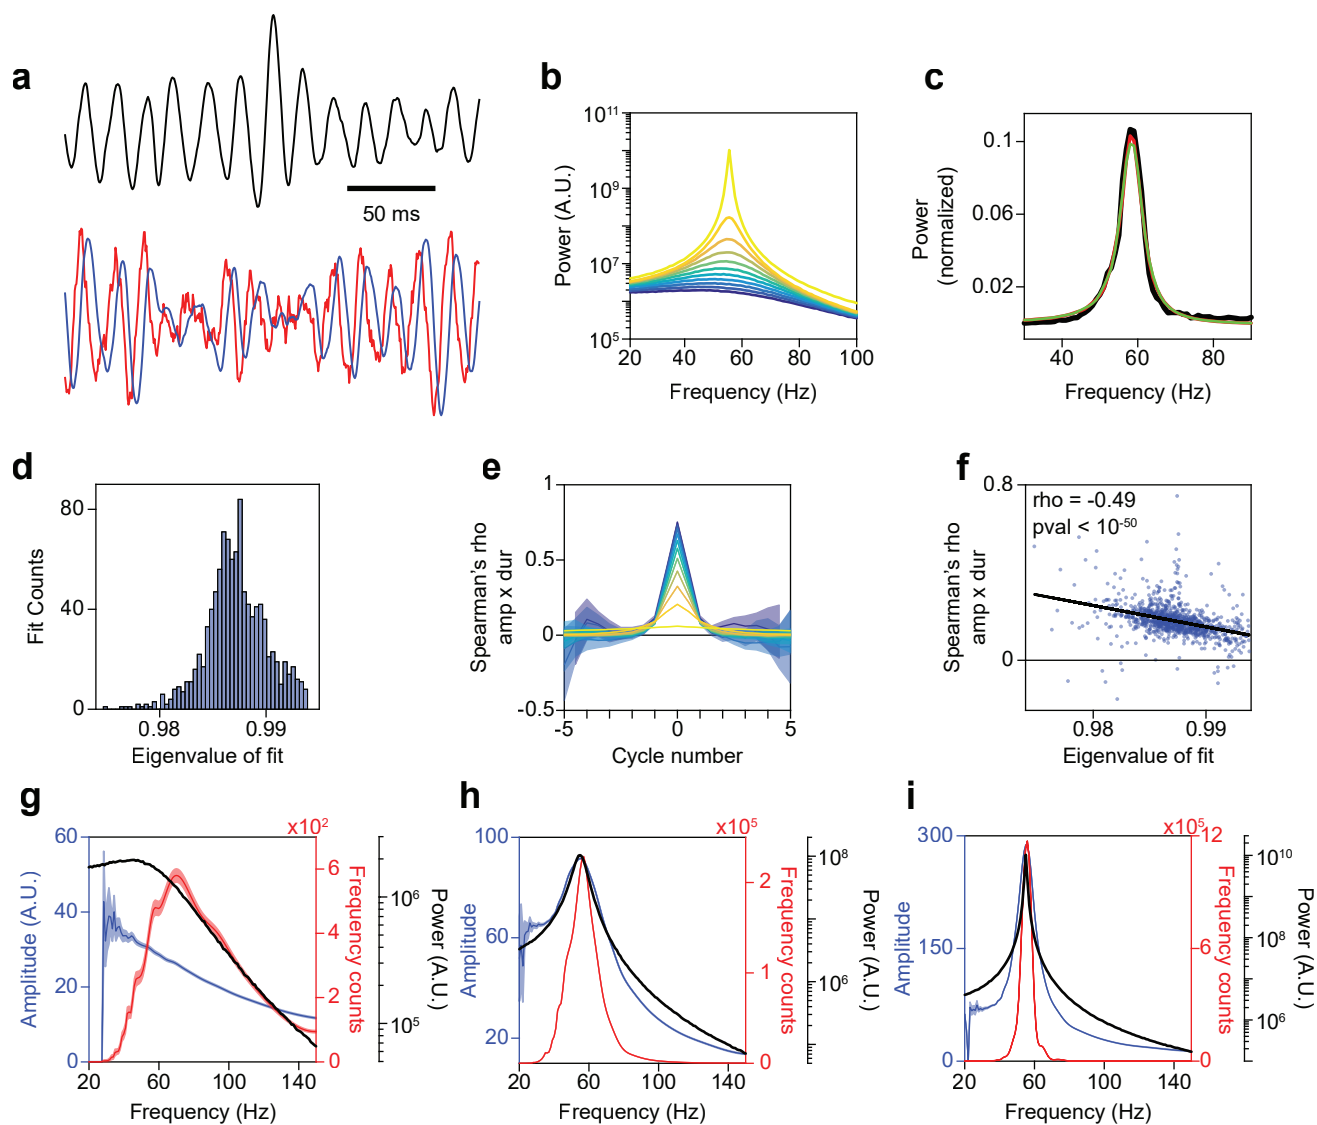

**Figure 8**

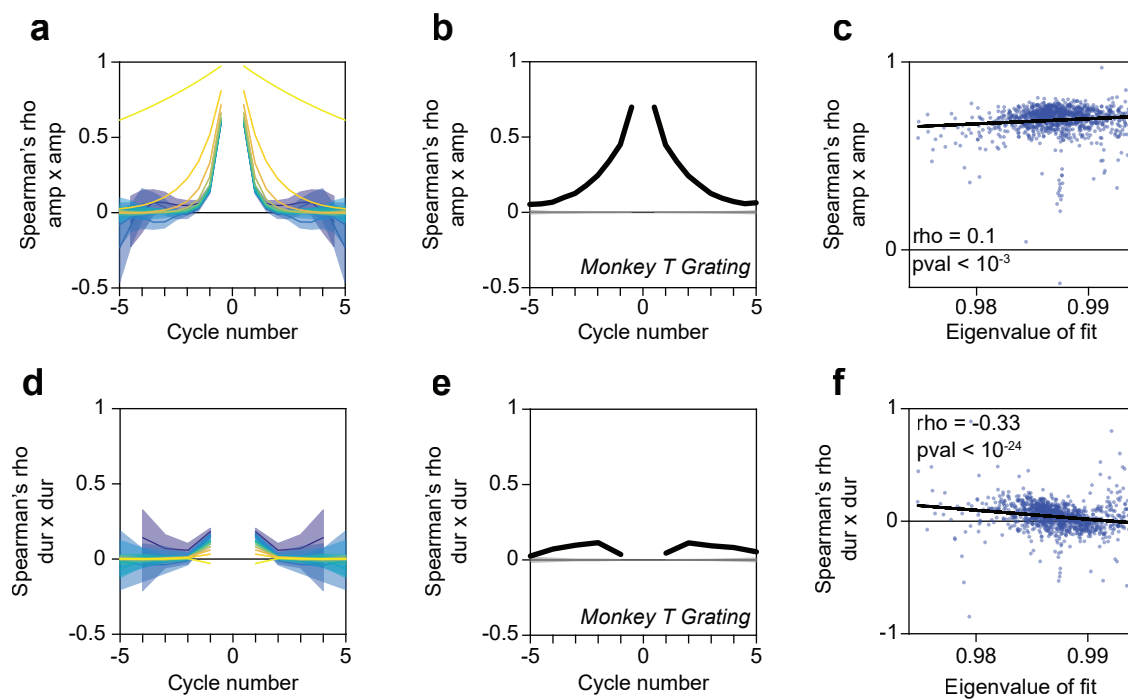

**Figure 9**

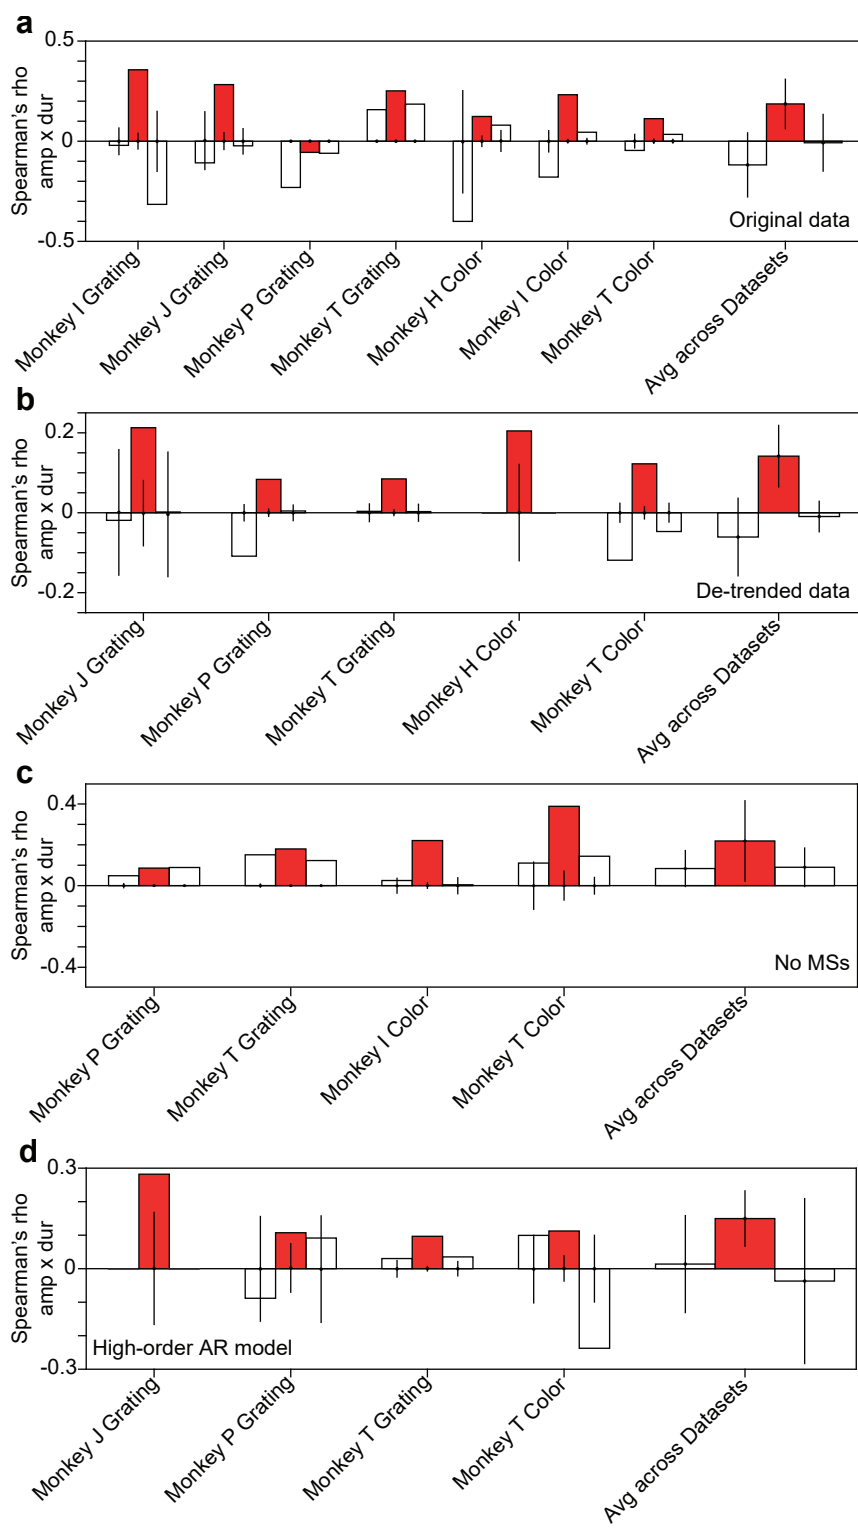

Supplementary Figure 1

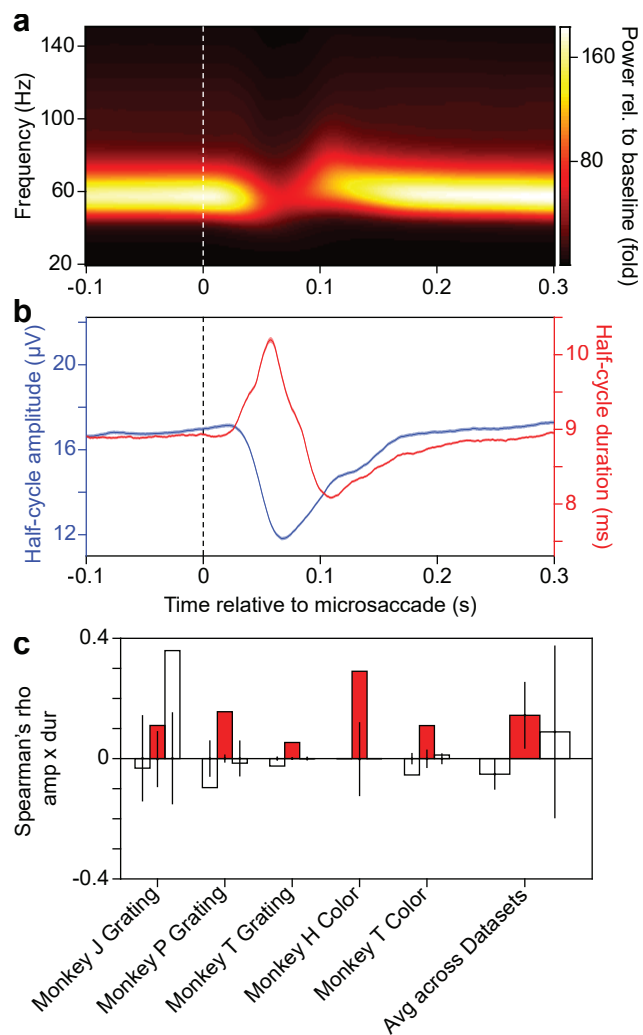

**Supplementary Figure 2**

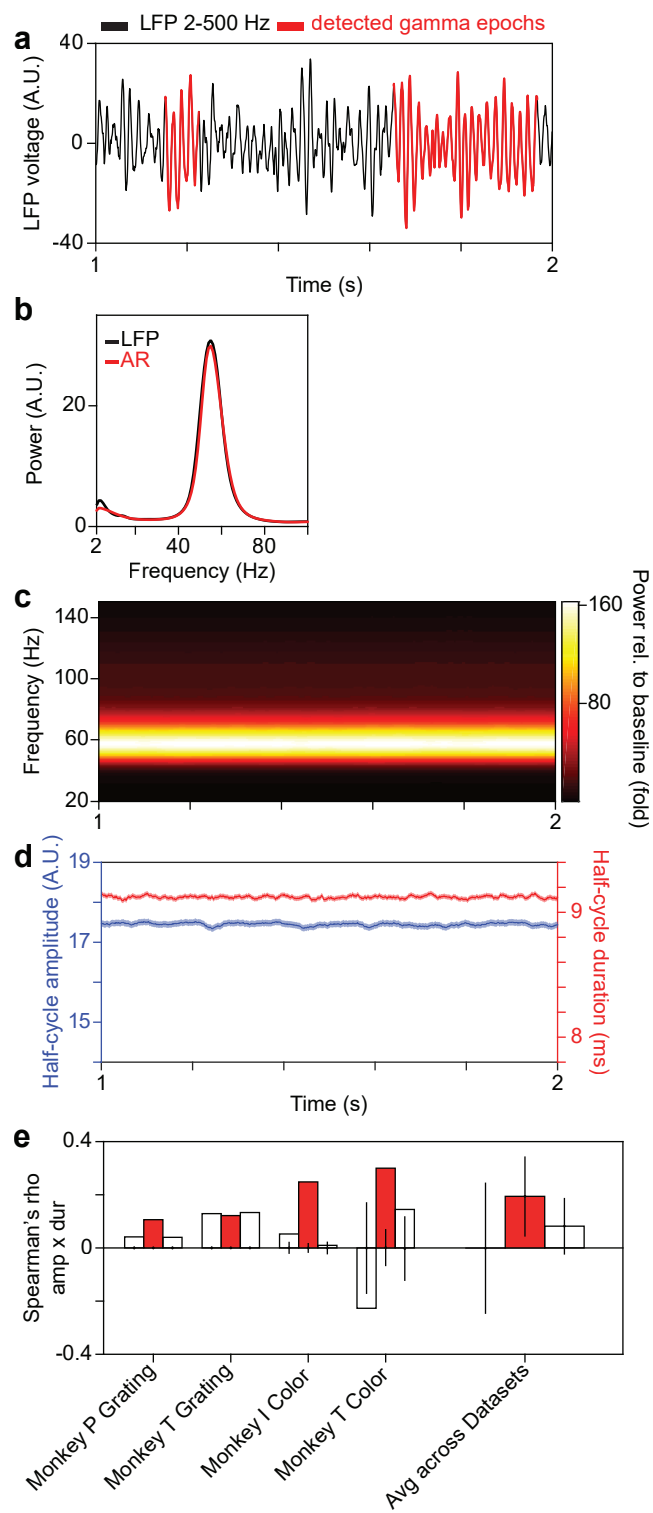

**Supplementary Figure 3**



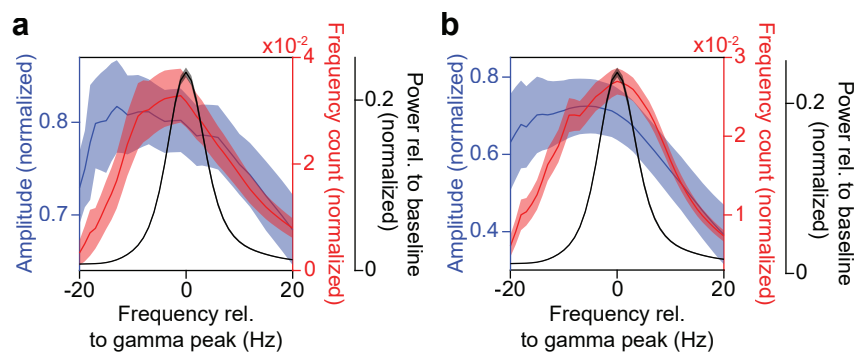

**Supplementary Figure 4**

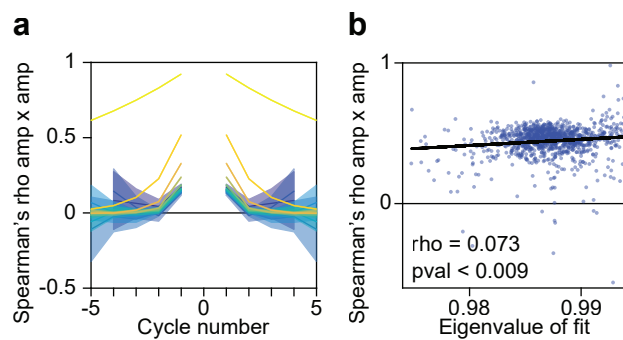

**Supplementary Figure 5**

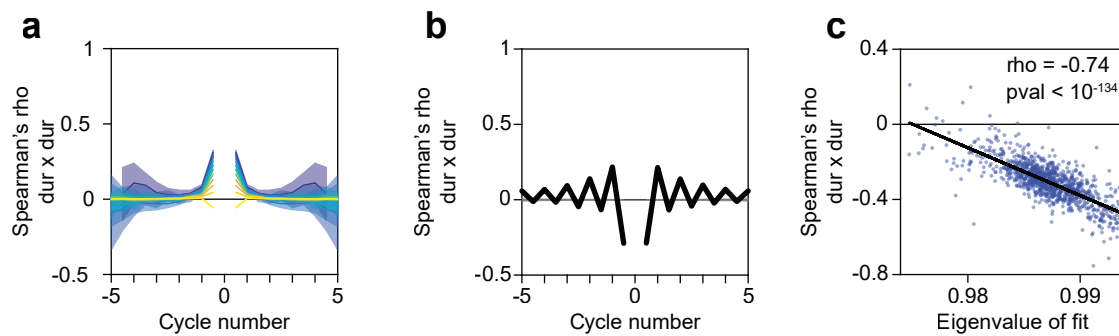

Supplementary Figure 6
